# Supplementary material for: Study protocol of the internet user Cohort for Unbiased Recognition of gaming disorder in Early adolescence (iCURE), Korea, 2015–2019
Source: PubMed Central journal article supplement — BMJ Open. 2017 Oct 5;7(10):e018350. doi: 10.1136/bmjopen-2017-018350 (PMC5640066; doi:10.1136/bmjopen-2017-018350), 2017-10-05
Supplement: bmjopen-2017-018350.draft_revisions.pdf [file bmjopen-2017-018350.draft_revisions.pdf]

# BMJ Open

BMJ Open is committed to open peer review. As part of this commitment we make the peer review history of every article we publish publicly available.

When an article is published we post the peer reviewers' comments and the authors' responses online. We also post the versions of the paper that were used during peer review. These are the versions that the peer review comments apply to.

The versions of the paper that follow are the versions that were submitted during the peer review process. They are not the versions of record or the final published versions. They should not be cited or distributed as the published version of this manuscript.

BMJ Open is an open access journal and the full, final, typeset and author-corrected version of record of the manuscript is available on our site with no access controls, subscription charges or pay-per-view fees (<http://bmjopen.bmj.com>).

If you have any questions on BMJ Open's open peer review process please email [editorial.bmjopen@bmj.com](mailto:editorial.bmjopen@bmj.com)

# BMJ Open

## Study Protocol of the Internet user Cohort for Unbiased Recognition of gaming disorder in Early Adolescence (iCURE), Korea, 2015–2019

|                                 |                                                                                                                                                                                                                                                                                                                                                                                                                                                                                                                                                                                                                                                                                                                                                                                                                                                                                                                                                                                 |
|---------------------------------|---------------------------------------------------------------------------------------------------------------------------------------------------------------------------------------------------------------------------------------------------------------------------------------------------------------------------------------------------------------------------------------------------------------------------------------------------------------------------------------------------------------------------------------------------------------------------------------------------------------------------------------------------------------------------------------------------------------------------------------------------------------------------------------------------------------------------------------------------------------------------------------------------------------------------------------------------------------------------------|
| Journal:                        | <i>BMJ Open</i>                                                                                                                                                                                                                                                                                                                                                                                                                                                                                                                                                                                                                                                                                                                                                                                                                                                                                                                                                                 |
| Manuscript ID                   | bmjopen-2017-018350                                                                                                                                                                                                                                                                                                                                                                                                                                                                                                                                                                                                                                                                                                                                                                                                                                                                                                                                                             |
| Article Type:                   | Protocol                                                                                                                                                                                                                                                                                                                                                                                                                                                                                                                                                                                                                                                                                                                                                                                                                                                                                                                                                                        |
| Date Submitted by the Author:   | 23-Jun-2017                                                                                                                                                                                                                                                                                                                                                                                                                                                                                                                                                                                                                                                                                                                                                                                                                                                                                                                                                                     |
| Complete List of Authors:       | Jeong, Hyunsuk; Catholic University of Korea School of Medicine<br>Yim, Hyun Woo; College of Medicine, The Catholic University of Korea, Department of Preventive Medicine<br>Jo, Sun Jin; College of Medicine, The Catholic University of Korea, Preventive Medicine<br>Lee, Seung-Yup ; Catholic University of Korea School of Medicine<br>Kim, Eunjin; Catholic University of Korea School of Medicine<br>Son, Hye Jung; Catholic University of Korea School of Medicine<br>Han, Hyun-ho; Catholic University of Korea School of Medicine<br>Lee, Hae Kook; Catholic University of Korea School of Medicine<br>Kweon, Yong-Sil ; Catholic University of Korea School of Medicine<br>Bhang, Soo-young ; Eulji Hospital<br>Choi, Jung-Seok ; Seoul National University Seoul Metropolitan Government Boramae Medical Center<br>Kim, Bung-Nyun ; Seoul National University College of Medicine<br>Gentile, Douglas A. ; Iowa State University<br>Potenza, Marc; Yale University |
| <b>Primary Subject Heading</b>: | Mental health                                                                                                                                                                                                                                                                                                                                                                                                                                                                                                                                                                                                                                                                                                                                                                                                                                                                                                                                                                   |
| Secondary Subject Heading:      | Addiction                                                                                                                                                                                                                                                                                                                                                                                                                                                                                                                                                                                                                                                                                                                                                                                                                                                                                                                                                                       |
| Keywords:                       | Internet gaming disorder, adolescents, cohort, protocol                                                                                                                                                                                                                                                                                                                                                                                                                                                                                                                                                                                                                                                                                                                                                                                                                                                                                                                         |
|                                 |                                                                                                                                                                                                                                                                                                                                                                                                                                                                                                                                                                                                                                                                                                                                                                                                                                                                                                                                                                                 |

SCHOLARONE™  
Manuscripts

1  
2  
3  
4  
5  
6  
7  
8  
9  
10  
11  
12  
13  
14  
15  
16  
17  
18  
19  
20  
21  
22  
23  
24  
25  
26  
27  
28  
29  
30  
31  
32  
33  
34  
35  
36  
37  
38  
39  
40  
41  
42  
43  
44  
45  
46  
47  
48  
49  
50  
51  
52  
53  
54  
55  
56  
57  
58  
59  
60

## Study Protocol of the Internet user Cohort for Unbiased Recognition of gaming disorder in Early Adolescence (iCURE), Korea, 2015–2019

Hyunsuk Jeong, PhD<sup>1</sup>, Hyeon Woo Yim, MD, PhD<sup>1\*</sup>, Sun-Jin Jo, PhD<sup>1</sup>, Seung-Yup Lee, MD<sup>2</sup>,  
Eunjin Kim, BS<sup>1</sup>, Hye Jung Son, BA<sup>1</sup>, Hyun-ho Han, BA<sup>1</sup>,  
Hae Kook Lee, MD, PhD<sup>2</sup>, Yong-Sil Kweon, MD, PhD<sup>2</sup>, Soo-young Bhang, MD, PhD<sup>3</sup>,  
Jung-Seok Choi, MD, PhD<sup>4</sup>, Bung-Nyun Kim, MD, PhD<sup>5</sup> Douglas A. Gentile, PhD<sup>6</sup>,  
Marc N. Potenza, MD, PhD<sup>7</sup>

<sup>1</sup>. Department of Preventive Medicine, College of Medicine, The Catholic University of Korea, Seoul, Korea

<sup>2</sup>. Department of Psychiatry, College of Medicine, The Catholic University of Korea, Seoul, Korea

<sup>3</sup>. Department of Psychiatry, College of Medicine, Eulji University, Seoul, Korea

<sup>4</sup>. Department of Psychiatry, SMG-SNU Boramae Medical Center, Seoul, Korea

<sup>5</sup>. Department of Psychiatry, Seoul National University College of Medicine, Seoul, Korea

<sup>6</sup>. Department of Psychology, Iowa State University, Iowa, USA

<sup>7</sup>. Department of Psychiatry, Yale University, Iowa, USA

### Corresponding author:

Name: Hyeon Woo Yim, MD, PhD

Address: Department of Preventive Medicine, College of Medicine, The Catholic University of Korea, 222 Banpodero, Seochogu, Seoul, Korea

Tel: +82-2-2258-7860

Fax: +82-2-532-3820

E-mail: [y1693@catholic.ac.kr](mailto:y1693@catholic.ac.kr)

## Abstract

### Introduction:

In 2013, the Diagnostic and Statistical Manual of Mental Disorders, Fifth Edition (DSM-5) proposed nine internet gaming disorder (IGD) diagnostic criteria as a condition warranting further empirical and clinical research. The aim of this study is to clarify the natural and clinical courses of IGD proposed DSM-5 in adolescents and to evaluate its risk and protective factors.

### Method and analysis:

The Internet user Cohort for Unbiased Recognition of gaming disorder in Early Adolescence (iCURE) study is an ongoing multidisciplinary, prospective, longitudinal cohort study conducted in 21 schools in Korea. Participant recruitment commenced in March 2015 with the goal of registering 3,000 adolescents. The baseline assessment included surveys on emotional, social, and environmental characteristics. A parent or guardian completed questionnaires and a structured psychiatric comorbidity diagnostic interview regarding their children. Adolescents with the Internet Game Use-Elicited Symptom Screen (IGUESS) total scores of 6 or higher were asked to participate in the clinical diagnostic interview. Two sub-cohorts of adolescents were constructed: a representative sub-cohort and a high-risk IGD sub-cohort. The representative sub-cohort comprises a randomly selected 10% of the iCURE to investigate the clinical course of IGD based on clinical diagnosis and to estimate the false negative rate. The high-risk IGD sub-cohort comprised participants meeting 3 or more of the nine IGD criteria, determined by clinical diagnostic interview, to show the clinical course of IGD. Follow-up data will be collected annually for the three years following the baseline assessments. The primary endpoint is 2-year incidence, remission, and recurrence rates of IGD. Cross-sectional and longitudinal associations between exposures and outcomes as well as mediation factors will be evaluated.

1  
2  
3  
4 Ethics and dissemination: This study is approved by the Institutional Review Board of The  
5  
6 Catholic University of Korea. Results will be published in peer-reviewed journals. This  
7  
8 study's protocol is registered at clinicaltrials.gov (identifier: NCT02415322).  
9  
10

### 11 12 13 14 15 16 17 18 19 20 **Article summary**

#### 21 Strengths and limitations of this study

- 22  
23 ● Internet gaming disorder (IGD) was assessed by using both polychotomous and  
24  
25 dichotomous tools based on the nine DSM-5 IGD criteria. In addition, we are  
26  
27 conducting structured interviews using DISC-IV of the parents or guardians to assess  
28  
29 participant psychiatric comorbidities.  
30  
31
- 32  
33 ● This study is that the clinical diagnosis of IGD based on the DSM-5 is performed by  
34  
35 qualified mental health specialists.  
36  
37
- 38  
39 ● It is not a representative sample because the registration was conducted among the  
40  
41 schools in the specific area.  
42  
43
- 44  
45 ● The participants were included only 3<sup>rd</sup>-, 4<sup>th</sup>-, and 7<sup>th</sup>-grade students.  
46  
47  
48  
49  
50  
51  
52  
53  
54  
55  
56  
57  
58  
59  
60

## Introduction

Internet games are popular entertainment in modern society, with a variety of people of different ages participating in gaming. Internet game play rates and sales are increasing<sup>1</sup>.

Players choose to play games for many reasons, including fun, recreation, coping with stress, sociability, and escaping real life<sup>2-4</sup>. The gaming research literature has reported both positive and negative effects on players. Playing games promotes problem solving and visual, motor, and spatial skills, and it fosters interaction with friends<sup>5</sup>. Although there are several positive effects of playing games for adolescents, there can also be negative effects, such as the possibility of problematic or addictive gaming<sup>6</sup>. Gaming has been associated with inattention and hyperactivity, aggressive behaviors, negative emotions including depression<sup>7,8</sup>, low self-esteem, social anxiety, loneliness<sup>9</sup>, and low psychological well-being<sup>10</sup>.

South Korea is one of the most highly digitalized societies in the world. The Internet penetration rate in South Korea exceeded 75% in 2011<sup>11</sup>. More than half of people in their 50s and almost 100% of teenagers use the Internet in their daily lives<sup>12</sup>. Korea has developed a computer industry with Internet use reaching over 50% of the population. Currently, in Korea, 25 million among 45 million citizens use the Internet, and 14.4 million homes are equipped with Internet access. In addition to home access, many people visit “PC rooms”, a type of gaming center with a broad-band Internet network that is equipped with the best performance computers in Korea. PC rooms became popular following the release of the PC game StarCraft in 1998, with an estimated 25,000 PC rooms nationwide in 2014. ‘PC rooms’ have no any age restrictions on accessibility, and many adolescents often play online games<sup>13</sup>. A 2010 nation-wide survey regarding Internet addiction showed that 8.0% of the Korean population and 12.4% of adolescents were addicted to Internet use, as assessed via the self-administered K-scale<sup>12</sup>. This prevalence is a little higher than has been found in other countries, such as Singapore (8.7%)<sup>14</sup>, the Netherlands (6.8%)<sup>15</sup>, the US (8.5%)<sup>16</sup>, and

1  
2  
3  
4 China (10.8%)<sup>17</sup>. The higher prevalence in Korea could be expected, given that it is a country  
5  
6 with such broad and easy access. Although the number of Internet game users has increased  
7  
8 dramatically over the last decade, the phenomenon of Internet gaming addiction is not yet  
9  
10 well understood, and research on its etiology and natural history is still in its infancy [2].  
11  
12 Studies have used various tools to estimate the prevalence of -Internet gaming disorder (IGD),  
13  
14 but the lack of common diagnostic criteria for IGD has created difficulties in comparing  
15  
16 studies.  
17

18  
19 In May 2013, IGD was included in Section III of the DSM-5 as a condition warranting  
20  
21 further study<sup>18</sup>. This marked the first occasion of IGD being formally recognized as a mental  
22  
23 health disorder. Even though the classification and rationale for including this condition as a  
24  
25 mental health disorder have been controversial, the suggested IGD classification criteria have  
26  
27 paved the way for measuring IGD in a consistent manner. These suggestions enable more  
28  
29 direct comparisons of findings and may be used to eventually reach a consensus on the status  
30  
31 of the disorder<sup>19</sup>. The DSM-5 proposes nine criteria for IGD, and it states explicitly that the  
32  
33 specific criteria and the threshold for diagnosis require systematic investigation and empirical  
34  
35 validation before their wide-scale adoption. The proposed criteria apply only to Internet  
36  
37 gaming, and not general Internet use, which can differ in terms of presenting symptoms,  
38  
39 etiology, comorbidities, course, and treatment. Empirical data are required to ascertain the  
40  
41 extent to which these criteria apply to various populations and to aid diagnosis. To this end,  
42  
43 we registered and began a prospective school-based cohort study of adolescents to provide  
44  
45 evidence regarding the IGD diagnostic criteria by clarifying the characteristics of IGD's  
46  
47 natural history. Given the broad discussion of a replicability "crisis" in many sciences, it is  
48  
49 valuable to document *a priori* our research methods, goals, and planned approach.  
50  
51  
52  
53  
54  
55

56  
57 Aims  
58  
59  
60

1  
2  
3  
4 The aim of the study is to clarify the natural and clinical courses of IGD based on the DSM-5  
5 diagnostic criteria, to provide evidence for empirical validation of the suggested IGD  
6 diagnostic criteria, and to further evaluate the etiological risk and predictive factors in  
7 adolescents.  
8  
9  
10  
11  
12  
13

## 14 **Methods**

### 15 **Study design and setting**

16  
17 The Internet user Cohort for Unbiased Recognition of gaming disorder in Early Adolescence  
18 (iCURE) study is a multidisciplinary, prospective, longitudinal cohort study of 3,000  
19 adolescents, conducted in Korea, with 4 waves of annual data collection currently planned.  
20 The study is being conducted in Seoul and Uijeongbu, Gyeonggi Province, with 3<sup>rd</sup>-, 4<sup>th</sup>-, and  
21 7<sup>th</sup>-grade students in 6 primary schools and 19 secondary schools participating. Participation  
22 requires consent from the participants as well as written parental consent following  
23 explanation of the nature of the principles of research, including confidentiality and the  
24 freedom of choice to participate. The study was fully reviewed and approved by the  
25 Institutional Review Board of The Catholic University of Korea (MC140NM10085) and was  
26 conducted in accordance with the Declaration of Helsinki.  
27  
28  
29  
30  
31  
32  
33  
34  
35  
36  
37  
38  
39  
40  
41  
42  
43

### 44 **Pretest and pilot test of methods**

45 We validated the feasibility of the study before beginning data collection by performing a  
46 pretest and a pilot test. For the pretest, we recruited a convenience sample of 25 3<sup>rd</sup>- and 4<sup>th</sup>-  
47 grade students to test the understandability of the questionnaires for this age group of students.  
48 We performed a pilot test to verify that the overall survey system worked well, with  
49 participants composed of one school class of 35 students. They completed all baseline  
50 measures which were recruited outside of the sampling frame.  
51  
52  
53  
54  
55  
56  
57  
58  
59  
60



## Recruitment

Participant recruitment commenced in March 2015. Recruitment took place at the school level. We sent official letters to all primary and secondary schools in three educational districts to invite their participation. After school principles provided consent for their schools to participate, the parents or guardians were contacted to obtain consent for their children to participate in the study. A total of 21 schools (6 elementary and 19 secondary) participated in the study, out of 258 schools (163 elementary and 95 secondary) in the three districts. In order to encourage participation in this research, the research team members visited the 21 participating schools to provide a seminar that presented the aims of the study and provided additional information about the research project to teachers and parents. The final enrollment is expected to be 3,000 adolescents. Three regional hospitals were designated in the three areas where the participating schools are located to provide treatment options for adolescents experiencing IGD.

## Inclusion and exclusion criteria

The inclusion criteria were that the participants were 3<sup>rd</sup>-, 4<sup>th</sup>-, or 7<sup>th</sup>-grade students at baseline. We required that each student participant had a parent or guardian who also participated in the study. The exclusion criteria included lack of competence in the Korean language by the parent or guardian and intellectual disability of the adolescent.

## Data collection

The participants completed questionnaires at baseline and will again annually for the following three years. The baseline assessments started in May 2015. We are collecting data from multiple informants, including students' self-report questionnaires, clinical diagnostic

1  
2  
3  
4 interviews of the students, parents' or guardians' self-report questionnaires, and structured  
5  
6 clinical interviews of the parents or guardians regarding any psychiatric comorbidity in their  
7  
8 children.  
9

#### 10 11 12 13 Follow-up and retention strategy

14  
15 In an effort to maintain contact with iCURE study participants, we will send individual  
16  
17 reports annually via registered mail, and we will periodically send text messages about  
18  
19 general contents via cell phone to the participants. Once a year, we will send each  
20  
21 participant's survey results to their parents via registered mail, which will be called a "mental  
22  
23 health signal." This will include the mental health status regarding symptoms of Internet  
24  
25 game addiction, depression, anxiety, and ADHD, marked as red, yellow, and green traffic  
26  
27 signals, indicating symptom severity as assessed by both the self-report survey and the  
28  
29 clinical diagnosis. We will also provide referrals for treatment availability.  
30  
31

32  
33 During this study, we are operating a 24-hour counseling helpline for the parents and  
34  
35 guardians. A clinical psychologist with more than 10 years of clinical experience specializing  
36  
37 in children and adolescents is conducting telephone consultations. This telephone counseling  
38  
39 is free and anonymous, providing parents with general counseling about their children, as  
40  
41 well as specific counseling regarding gaming addiction.  
42  
43  
44  
45

#### 46 47 *Student self-report questionnaires*

48  
49 Student data collection is conducted at the schools during school hours. The 7<sup>th</sup>-grade students  
50  
51 complete questionnaires using a web-based self-administration method. The 3<sup>rd</sup>- and 4<sup>th</sup>-grade  
52  
53 students complete the questionnaires in a class setting; a research assistant reads the questions  
54  
55 aloud, following a standard script, to aid comprehension and diminish time demands. In later  
56  
57 waves, all students will complete the questionnaires on their own, with a supervising research  
58  
59  
60

1  
2  
3  
4 assistant available to answer questions. During the baseline assessment, the questionnaires  
5  
6 took approximately 90–120 minutes to complete; later waves will take approximately 45–80  
7  
8 minutes.  
9

10 The student data collection at later waves will also be conducted at the schools during school  
11  
12 hours. For students who transfer to other schools, arrangements will be made to complete the  
13  
14 follow-up questionnaires, either by visiting their homes or via website access.  
15  
16

### 17 18 19 *Interviewing parents*

20  
21 At baseline, each parent or guardian completed a questionnaire and the Diagnostic Interview  
22  
23 Schedule for Children, Version 4 (DISC-IV). The DISC-IV is a highly structured diagnostic  
24  
25 interview used to assess psychiatric disorders in children and adolescents. We are including 7  
26  
27 of the 34 diagnostic assessments: generalized anxiety disorder, separation anxiety, obsessive-  
28  
29 compulsive disorder, major depression disorder, attention deficit disorder and attention deficit  
30  
31 hyperactive disorder (ADD/ADHD), oppositional defiant disorder, and conduct disorder.  
32  
33 The DISC-IV was administered by trained interviewers at the participants' homes or at a  
34  
35 private space at the school, based on the participant's preference. The parent questionnaire  
36  
37 contained demographic questions and took 20 to 30 minutes to complete, and the DISC-IV  
38  
39 took 40 to 90 minutes. Parent or guardian survey is conducting only at baseline.  
40  
41  
42  
43  
44  
45

### 46 *Second-stage clinical diagnosis by mental health professionals*

47  
48 The clinical diagnostic interviews for IGD were conducted face-to-face by five psychiatrists  
49  
50 and four Master's degree-level clinical psychologists with at least five years of training and  
51  
52 clinical experience. The interviews assessed participants based on the nine DSM-5 IGD  
53  
54 criteria, in accordance with the international consensus for IGD represented in the DSM-5<sup>19</sup>.  
55  
56 Diagnoses were based on clinically significant functional impairments that substantially  
57  
58  
59  
60

1  
2  
3  
4 derived from gaming and not from any other psychiatric illnesses. Any psychiatric  
5  
6 comorbidities were also thoroughly evaluated by the psychiatrists using the semi-structured  
7  
8 tool of the Kiddie-Schedule for Affective Disorders and Schizophrenia-Present and Lifetime  
9  
10 Version-Korean version (K-SADS-PL), which has been previously validated in Korean<sup>20</sup>.  
11  
12 Global functioning was assessed using the Children's Global Assessment Scale (GAS), based  
13  
14 on the child's worst level of emotional and behavioral functioning in the past three months.  
15  
16 The criterion for a second-stage clinical diagnosis is an Internet Game Use-Elicited Symptom  
17  
18 Screen (IGUESS) total score of 6 or higher, either at baseline or at the follow-up waves.  
19  
20 Additionally, random selection of 10% of the full cohort, stratified by the school, completed  
21  
22 the clinical diagnostic interviews at baseline and the further follow-up waves. Anyone who  
23  
24 responds insincerely with marking all of the same numbers to the IGUESS at every wave will  
25  
26 be excluded to rule out false negatives. Anyone who reports a suicidal experience during the  
27  
28 past year at any wave will be given diagnostic interviews. The clinical diagnostic interviews  
29  
30 are being conducted one week after completion of the baseline study. The interviews are  
31  
32 being conducted confidentially in private spaces at the participants' schools.  
33  
34  
35  
36  
37  
38

### 39 *Sub-cohorts*

40  
41 Two sub-cohorts have been constructed. A representative sub-cohort consists of a randomly  
42  
43 selected 10% of adolescents in the cohort. They will participate in the clinical diagnostic  
44  
45 interview every year to estimate the false negative rate and to evaluate the clinical course of  
46  
47 DSM-5–defined IGD based on clinical diagnosis. Additionally, a high-risk IGD sub-cohort is  
48  
49 comprised of those meeting 3 or more of the 9 IGD criteria, as determined by the clinical  
50  
51 diagnostic interview at baseline and at each follow-up wave. The interviews will be  
52  
53 conducted annually for 3 years to observe the clinical history, remission, and recurrence rates.  
54  
55  
56  
57  
58  
59  
60

## Measurement

The measurements using i-CURE are presented in Table 1.

### *Demographic information*

Demographic characteristics were assessed at baseline. Sex, date of birth, family composition, and number of siblings were obtained from the student assessment, and parental education level, socio-economic status, parental marital status, parental education level, and parental job were obtained from the parent or guardian assessments.

### *Internet, gaming, and smartphone use*

Comprehensive assessments of participants' Internet, gaming, and smartphone usage were performed, including questions regarding the first time of exposure, the average daily time spent online, and gaming-related questions, such as online gaming type preference and weekly playing time. We classified online games as role-playing games, shooter games, simulation games, arcade games, and unknown.

### *Regulated usage of smartphones or games*

We assess school policies on possession and usage of smartphones and domestic regulations of smartphone or game time.

### *Internet Addiction Test (IAT)*

Young's IAT consists of 20 items rated on a 5-point Likert scale from *rarely* (1) to *always* (5), with higher scores indicating more severe Internet addiction<sup>21</sup>.

### *Korean Scale for Internet Addiction (K-Scale)*

To assess Internet addiction, we use the K-Scale-short form for adolescents, which were developed in Korea. It is comprised of 20 items rated on a 4-point Likert scale, from 1 (*not at all*) to 4 (*always*)<sup>22</sup>.

### *Internet Game Use-Elicited Symptom Screen (IGUESS)*

This instrument was created based on the nine DSM-5 IGD criteria. Students are instructed to

1  
2  
3  
4 respond based on their gaming behavior within the last 12 months, with each item rated on a  
5  
6 4-point scale: 1=*strongly disagree*, 2=*somewhat disagree*, 3=*somewhat agree*, 4=*strongly*  
7  
8 *agree*).

#### 10 *Self-reported version of structured clinical interview for Internet Gaming Disorder (SR-IGD)*

11  
12 We use the SR-IGD to assess IGD with respect to occurrences over the past 6 months. The  
13  
14 assessment uses yes-or-no questions<sup>23</sup>.

#### 17 *Smartphone Addiction Scale (SAS-SV)*

18  
19 We assessed smartphone addiction using the short version of the Smartphone Addiction Scale  
20  
21 (SAS-SV). The SAS-SV addresses the following 5 content areas with respect to the previous  
22  
23 year: (1) daily-life disturbance, (2) withdrawal, (3) cyberspace-oriented relationship, (4)  
24  
25 overuse, and (5) tolerance. It contains 10 items rated on a dimensional scale (1=*strongly*  
26  
27 *disagree* to 6=*strongly agree*). The total scores range from 10 to 60, with the higher scores  
28  
29 indicating greater degrees of smartphone addiction<sup>24</sup>.

#### 32 *Children's Depression Inventory (CDI)*

33  
34 The Children's Depression Inventory (CDI) is a 27-item, self-rated, symptom-oriented scale  
35  
36 suitable for youths aged 7 to 17 years. It assesses cognitive, affective, somatic, and behavioral  
37  
38 symptoms, with items scored from 0 to 2, where 0 means *the symptom is not present*, 1 means  
39  
40 *the symptom is present and mild*, and 2 means *the symptom is present and marked*<sup>25</sup>.

#### 43 *Trait Anxiety Inventory for Children (TAIC)*

44  
45 To examine trait anxiety, we used the Korean translation<sup>26</sup> of the Trait Anxiety Inventory for  
46  
47 Children (TAIC), which is part of the State-Trait Anxiety Inventory for Children (STAIC)  
48  
49 developed by Spielberger and colleagues (1973). The Korean TAIC is a 20-item inventory  
50  
51 that asks respondents to indicate how frequently, on a 3-point scale (1=*almost never* to  
52  
53 3=*almost always*), they feel worried, bothered, or nervous<sup>27</sup>..

#### 56 *Korean version of the ADHD Rating Scale (K-ARS)*

1  
2  
3  
4 The Korean version of the ADHD Rating Scale (K-ARS) was used to assess ADHD which  
5 was originally developed by DuPaul<sup>28</sup>. The K-ARS is a scale for ADHD symptom severity  
6 composed of 18 items (9 items for inattention and 9 items for hyperactivity) scored from as 0  
7  
8  
9  
10  
11  
12  
13  
14  
15  
16  
17  
18  
19  
20  
21  
22  
23  
24  
25  
26  
27  
28  
29  
30  
31  
32  
33  
34  
35  
36  
37  
38  
39  
40  
41  
42  
43  
44  
45  
46  
47  
48  
49  
50  
51  
52  
53  
54  
55  
56  
57  
58  
59  
60  
The Korean version of the ADHD Rating Scale (K-ARS) was used to assess ADHD which was originally developed by DuPaul<sup>28</sup>. The K-ARS is a scale for ADHD symptom severity composed of 18 items (9 items for inattention and 9 items for hyperactivity) scored from as 0 (never or rarely) to 3 (very often)<sup>29</sup>.

#### *Diagnostic Interview Schedule for Children, Version IV (DISC-IV)*

In the current study, the DISC-IV was administered by a trained interviewer. The DISC-IV is comprised of six domains of possible impairment present during a “time in the last year when symptoms caused the most problems.” These domains are (1) getting along with parent caretakers, (2) participating in family activities, (3) participating in peer activities, (4) academic/occupational functioning, (5) relationships with teachers, and (6) distress attributable to symptoms. Each set of questions has a 2-part structure, the first determining whether impairment is present, and the second measuring severity or frequency. We selected an introductory module that includes demographic information (age, grade, names and ages of siblings, and identification of caretakers and attachment figures). The remainder of the interview is organized into 3 modules, each containing related diagnoses (anxiety, mood, and disruptive disorders)<sup>30</sup>.

#### *Presence of suicidal ideation, suicide plans, and suicide attempts*

The presence of suicidal ideation, suicide plans, and suicide attempts is determined using the following direct questions derived from the Structured Clinical Interview for DSM-IV Axis I Disorders (SCID-I). Participants are asked whether they had seriously considered committing suicide, made a plan to commit suicide, or attempted suicide during the past year. The presence or absence of suicide ideation, plans, and attempts is based on the subject response (yes or no)<sup>31</sup>

#### *Patient Health Questionnaire (PHQ-9)*

The PHQ-9 is a multipurpose instrument that assists in screening, diagnosing, and monitoring

1  
2  
3  
4 depression severity. It incorporates the DSM-IV depression diagnostic criteria with other  
5  
6 leading major depressive symptoms into a brief nine-item, self-report tool. Respondents rate  
7  
8 the frequency of the symptoms over the last 2 weeks on a 4-point rating scale (*not at all* = 0;  
9  
10 *several days* = 1; *more than half of the days* = 2; *nearly every day* = 3) <sup>32</sup>.

### 11 12 *Rosenberg's Self-Esteem Scale*

13  
14 Rosenberg's Self-Esteem Scale has 10 items, each rated on a 5-point Likert scale, ranging  
15  
16 from 1 (*strongly disagree*) to 5 (*strongly agree*). The total score ranges from 10 to 50 <sup>33</sup>.

### 17 18 *Self-Control Scale*

19  
20 Self-Control Scale is defined by Gottfredson and Hirschi (1990) <sup>34</sup>. The 20-item scale is  
21  
22 divided into two self-control constructs: immediate and delayed satisfaction. Each item is  
23  
24 rated on a 4-point scale: (4) *strongly agree*, (3) *agree somewhat*, (2) *disagree somewhat*, and  
25  
26 (1) *strongly disagree*. Higher scores indicate lower self-control.  
27  
28

### 29 30 *Aggression Questionnaire (AQ)*

31  
32 The Buss-Perry Aggression Questionnaire is a 29-item scale that measure four aspects of  
33  
34 human aggression and hostile personality. Participants rate each item using a 5-point Likert  
35  
36 scale from 1 (*uncharacteristic of me*) to 5 (*very characteristic of me*)<sup>35</sup>.

### 37 38 *Social Support Appraisals Scale: Child's Subjective Appraisal of Family, Peer, and Teacher* 39 40 *Support (SSAS)*

41  
42 We use the Social Support Appraisals Scale: Child's Subjective Appraisal of Family, Peer,  
43  
44 and Teacher Support (SSAS) to address the adolescent participants' perceived support. It is a  
45  
46 41-item self-report instrument developed by Dubow et al. (1989) <sup>36</sup>. Items are rated on a 5-  
47  
48 point Likert scale, from 1 (*never*) to 5 (*always*).  
49  
50

### 51 52 *Parent-Adolescent Communication Inventory (PACI)*

53  
54 The Parent-Adolescent Communication Inventory (PACI) is a 40-item inventory used to  
55  
56 assess communication in the parent–adolescent relationship. There are two forms of the  
57  
58  
59  
60



1  
2  
3  
4 inventory, one for parents and the other for adolescents. Scores range from 0 to 120, with  
5  
6 higher scores reflecting a greater degree of parent-adolescent communication <sup>37</sup>.  
7

#### 8 *The Children's Perception of Interparental Conflict Scale (CPIC)*

9  
10 The CPIC uses a multiple-choice format with three possible responses: *true*, *sort of true*, and  
11  
12 *false*. Items are scored from 1 to 3, with 3 reflecting more negative forms of conflict and their  
13  
14 appraisal <sup>38</sup>.  
15

#### 16 *Revised Inventory of Parent and Peer Attachment (IPPA\_R)*

17  
18 The original IPPA was developed by Armsden and Greenberg (1987) to assess adolescents'  
19  
20 perceptions of the positive and negative affective and cognitive dimensions of relationships  
21  
22 with their parents and close friends. In particular, the inventory examines how well these  
23  
24 figures serve as sources of psychological security. Three broad dimensions are assessed:  
25  
26 degree of mutual trust, quality of communication, and alienation. Participants are asked to  
27  
28 rate each of the items on a 5-point Likert-scale from 1 (*never true*) to 5 (*always true*) <sup>39</sup>.  
29  
30  
31

#### 32 *Physical and mental health status*

33  
34 We assess physical pain experiences, such as in the hand, wrist, shoulder, or neck; dry eyes;  
35  
36 drinking and smoking habits during the past year; histories of physical illness, including  
37  
38 rheumatoid arthritis, lupus, diabetes mellitus; and psychiatric illness, including depression,  
39  
40 anxiety disorders, and ADHD. We also ask about sleep hours during the week and during  
41  
42 weekends.  
43  
44  
45

#### 46 *Sample size estimation*

47  
48 We calculated the study sample size required to investigate whether overuse of Internet  
49  
50 gaming is a risk factor of IGD presence at the 2-year follow up. For a 15% prevalence of  
51  
52 exposure to 3 or more hours per day of Internet gaming, a 5% incidence of IGD at the 2-year  
53  
54 follow-up period, a relative risk of this risk factor for IGD of 2 (RR=2.0), and setting  $\alpha$  at  
55  
56  
57  
58  
59  
60

1  
2  
3  
4 0.05 and  $\beta$  at 0.20 (power of 0.80), a sample size of 2,559 is required. Considering a dropout  
5  
6 rate of 14%, the required sample size is estimated to be almost 3,000. We expect there will be  
7  
8 150 adolescents at high-risk for IGD (meeting 3 or more of the 9 DSM-5 IGD criteria) among  
9  
10 the 3,000 participants at baseline, and we estimate that 75 new IGD cases will be found at the  
11  
12 2-year follow-up<sup>40</sup>.

13  
14  
15  
16  
17 Strategies to minimize error and bias

18  
19 *Online assessment system*

20  
21 The participants log onto the study's website with unique authentication codes provided,  
22  
23 where they complete the online questionnaires. We use a branched algorithmic structure to  
24  
25 enhance the confidentiality and accuracy of responses and to reduce the risk of exposing  
26  
27 sensitive information.

28  
29  
30 *Training of the interviewers*

31  
32 To administer the parent-guardian surveys, we recruited psychologists and nurses with  
33  
34 Bachelor's or Master's degrees, and the research team provided them with training that  
35  
36 included information on Internet gaming addiction and communication skills, through a 2-day  
37  
38 (16-hour) training workshop. In addition to administering the surveys, the interviewers  
39  
40 reported on the status of the data collection and any problems and issues arising during the  
41  
42 interviews, at mandatory weekly meetings.

43  
44  
45 Prior to the diagnostic interviews and twice each year, all psychiatrists and clinical  
46  
47 psychologists attend a seminar about IGD diagnosis to increase inter-rater reliability and  
48  
49 diagnostic agreement. In the seminar, we review recent papers on IGD diagnosis and provide  
50  
51 mock cases in a video to enhance diagnostic concordance. Also, at the end of each day of  
52  
53 diagnostic interviews, all psychiatrists and clinical psychologists who participate in the  
54  
55 clinical diagnosis attend a case conference to discuss any ambiguous diagnoses and make  
56  
57  
58  
59  
60

1  
2  
3  
4 final determinations.  
5  
6  
7

#### 8 9 Statistical analyses plan

10 We will calculate the 2-year incidence, remission, and recurrence rates of IGD, with 95%  
11 confidence intervals. We will investigate the cross-sectional and longitudinal associations  
12 between exposures and outcomes using a logistic or linear regression model or a generalized  
13 linear model, as appropriate. Models will include exposures to games, such as time spent  
14 playing games, types of Internet games, and gaming-related activities, with IGD as the  
15 outcome variable and covariates including socio-demographic, personal, social, and  
16 environmental factors. Moderation tests will examine for differences in associations and  
17 mediation tests will assess indirect effects based on socio-demographic, personal, social, and  
18 environmental factors.  
19  
20  
21  
22  
23  
24  
25  
26  
27  
28  
29  
30  
31  
32

#### 33 **Ethics and dissemination**

34 All procedures performed in studies involving human participants were in accordance with  
35 the ethical standards of the Institutional Review Board of The Catholic University of Korea  
36 (approval number: MC140NM10085) and with the 1964 Helsinki declaration and its later  
37 amendments or comparable ethical standards. Written consent was received from all  
38 participants and from one of the participants' parents or caregivers following an explanation  
39 of the study, including confidentiality and freedom of choice to participate. All results will be  
40 published in relevant peer-reviewed international scientific journals and presented at conferences, nationally and  
41 internationally.  
42  
43  
44  
45  
46  
47  
48  
49  
50  
51  
52  
53

#### 54 **Discussion**

55 A major strength of this study is that it is conducted in a county with a particularly high  
56  
57  
58  
59  
60

1  
2  
3  
4 burden of IGD in adolescents. Korea has a high likelihood of exposure to games because  
5  
6 Korea plays a leading role in the development of the game industry and is one of the most  
7  
8 highly digitalized societies in the world. It provides a high-access environment for Internet  
9  
10 gaming, including PC rooms, which have broad-band Internet networks and are equipped  
11  
12 with the best performance computers in Korea. This makes Korea an optimal place to  
13  
14 perform a cohort study to characterize IGD.

15  
16 We are screening 3<sup>rd</sup>-, 4<sup>th</sup>-, and 7<sup>th</sup>-grade students for IGD using both polychotomous and  
17  
18 dichotomous tools based on the nine DSM-5 IGD criteria. In addition, we are conducting  
19  
20 structured interviews using DISC-IV of the parents or guardians to assess participant  
21  
22 psychiatric comorbidities. Because the participants are early adolescents, we obtained their  
23  
24 mental health status through their parents or guardians. Self-reports can include false or  
25  
26 insincere reports, making evaluation of the IGD risk factors less accurate. To reduce this  
27  
28 effect, we have added a reverse scale to each self-report questionnaire.

29  
30 Another strength of this study is that the clinical diagnosis of IGD based on the DSM-5 is  
31  
32 performed by qualified mental health specialists. Most prior studies have not been able to  
33  
34 also get a true clinical diagnosis along with the screening tool scores, so this study will  
35  
36 provide needed validity data. Participants included those considered positive for IGD, defined  
37  
38 as scores of 6 or higher on IGUESS, as well as a reference group of a random selection of 10%  
39  
40 of the participants. We have constructed two sub-cohorts from those who have participated in  
41  
42 the clinical diagnosis: a representative and a high-risk cohort. The representative sub-cohort  
43  
44 consists of 10% randomly selected adolescents from the full cohort. They participate in the  
45  
46 clinical diagnostic interview every year in order to estimate the false negative rate and to  
47  
48 evaluate the clinical course of IGD, observed via the diagnostic interviews. The high-risk  
49  
50 sub-cohort is comprised of participants meeting 3 or more of the 9 IGD criteria, based on the  
51  
52 clinical diagnostic interviews at baseline and each follow-up wave. The high-risk sub-cohort  
53  
54  
55  
56  
57  
58  
59  
60

1  
2  
3  
4 is similar to a dynamic cohort. The suggested diagnostic criteria of IGD in DSM-5 is to meet  
5  
6 5 or more of the 9 IGD criteria; however, we plan to follow those adolescent participants  
7  
8 meeting 3 or more clinical diagnostic interview in any year in order to investigate the course  
9  
10 of IGD at syndromal and subsyndromal levels.

11  
12 This study aims to clarify the natural and clinical courses of IGD based on the DSM-5  
13  
14 suggested diagnostic criteria in order to empirical validate the criteria and to evaluate the risk  
15  
16 and predictive factors in adolescents based on the IGD diagnostic criteria. This study will  
17  
18 contribute to establishing standardized IGD diagnostic criteria and to providing scientific  
19  
20 evidence regarding the proposed DSM-5 IGD diagnostic criteria.  
21  
22  
23  
24  
25  
26  
27

### 28 **Keywords:**

29 Internet gaming disorder, adolescents, cohort, protocol  
30  
31

### 32 **Lists of Abbreviations**

33 Aggression Questionnaire (AQ)  
34 Attention Deficit Hyperactivity Disorder (ADHD)  
35 Children's Depression Inventory (CDI)  
36 Children's Perception of Inter-parental Conflict Scale (CPIC)  
37 Diagnostic and Statistical Manual of Mental Disorders 5th version (DSM-5)  
38 Diagnostic Interview Schedule for Children, Version IV (DISC-IV)  
39 Global assessment scale (GAS)  
40 International Classification of Diseases 10th version (ICD-10)  
41 International Classification of Diseases 11th version (ICD-11)  
42 Internet Game Use-Elicited Symptom Screen (IGUESS)  
43 Internet gaming disorder (IGD)  
44 Internet user Cohort for Unbiased Recognition of gaming disorder in Early adolescents  
45 (iCURE)  
46 Kiddie-Schedule for Affective Disorders and Schizophrenia-Present and Lifetime Version-  
47 Korean version (K-SADS-PL)  
48 Korean version of the ADHD Rating Scale (K-ARS)  
49 Parent-Adolescent Communication Inventory (PACI)  
50 Parent-Adolescent Communication Inventory (PACI)  
51 Parenting attitude test (PAT)  
52 Patient Health Questionnaire (PHQ-9)  
53 Post-traumatic stress disorder (PTSD)  
54 Revised Inventory of Parent and Peer Attachment (IPPA-R)  
55 Smartphone Addiction Scale (SAS-SV)  
56  
57  
58  
59  
60

1  
2  
3  
4 Social Support Appraisal Scale (SSAS)  
5 Standard Patients Evaluation of Eye Dryness Questionnaire (SPEED)  
6 Structured Clinical Interview for DSM-IV Axis I Disorders (SCID-I)  
7 Self-reported version of structured clinical interview for Internet Gaming Disorder (SR-IGD)  
8  
9

10  
11 **Funding:**

12 This study was supported by a grant from the Korean Mental Health Technology R&D  
13 Project, Ministry of Health and Welfare, Republic of Korea (HM14C2603). The Ministry of  
14 Health and Welfare had no further role in areas of study design, collection, analysis, and  
15 interpretation of data, report writing, or in the decision to submit the paper for publication.  
16

17 **Availability of data and materials**

18 Not applicable. This protocol was not included any participants data.  
19

20  
21 **Authors' contribution:**

22 HJ conducted the analyses and led the writing of the manuscript. HWY guided and  
23 supervised the writing of the manuscript. HWY, HJ, and SJ developed and proposed the basic  
24 idea of the study. HWY, HJ, SJ, EK, HS and HH contributed to conducting the study. SL, HL,  
25 YK, SB, and JC conducted diagnostic interviews. BK guided to performance DISC  
26 assessment. DAG advised to construct study design. DAG and MNP reviewed scientific and  
27 proof reading of the manuscript. All authors contributed editorial comments on the  
28 manuscript.  
29

30  
31 **Conflict of interest:**

32 The authors declare no conflicts of interest with respect to the content of the manuscript..  
33

34 **Consent for publication**

35 Not applicable.  
36  
37  
38  
39  
40  
41  
42  
43  
44  
45  
46  
47  
48  
49  
50  
51  
52  
53  
54  
55  
56  
57  
58  
59  
60

## References

1. Entertainment\_software\_association. 2012 Essential facts about the computer and video game industry. Retrieved from [http://www.theesacom/facts/pdfs/ESA\\_EF\\_2012pdf](http://www.theesacom/facts/pdfs/ESA_EF_2012pdf) 2012
2. Wan CS, Chiou WB. Why are adolescents addicted to online gaming? An interview study in Taiwan. *Cyberpsychology & behavior : the impact of the Internet, multimedia and virtual reality on behavior and society* 2006;9(6):762-6. doi: 10.1089/cpb.2006.9.762 [published Online First: 2007/01/05]
3. Wood RT, Griffiths MD. A qualitative investigation of problem gambling as an escape-based coping strategy. *Psychology and psychotherapy* 2007;80(Pt 1):107-25. doi: 10.1348/147608306x107881 [published Online First: 2007/03/10]
4. Kuss DJ, Griffiths MD, Karila L, et al. Internet addiction: a systematic review of epidemiological research for the last decade. *Current pharmaceutical design* 2014;20(25):4026-52. [published Online First: 2013/09/05]
5. Boot WR, Kramer AF, Simons DJ, et al. The effects of video game playing on attention, memory, and executive control. *Acta psychologica* 2008;129(3):387-98. doi: 10.1016/j.actpsy.2008.09.005 [published Online First: 2008/10/22]
6. Witt E. MA, , & Jackson L. Trends in youth's videogame playing, overall computer use, and communication technology use: The impact of self-esteem and the Big Five personality factors. *Computers in Human Behavior archive* 2011;27(2):763-69
7. Chan PA, Rabinowitz T. A cross-sectional analysis of video games and attention deficit hyperactivity disorder symptoms in adolescents. *Annals of general psychiatry* 2006;5:16. doi: 10.1186/1744-859x-5-16 [published Online First: 2006/10/25]
8. Desai RA, Krishnan-Sarin S, Cavallo D, et al. Video-gaming among high school students: health correlates, gender differences, and problematic gaming. *Pediatrics* 2010;126(6):e1414-24. doi: 10.1542/peds.2009-2706 [published Online First: 2010/11/17]
9. Van Rooij AJ, Schoenmakers TM, Vermulst AA, et al. Online video game addiction: identification of addicted adolescent gamers. *Addiction (Abingdon, England)* 2011;106(1):205-12. doi: 10.1111/j.1360-0443.2010.03104.x [published Online First: 2010/09/16]
10. Barnett JaC, Mark Virtually real: a psychological perspective on massively multiplayer online games. . *Review of General Psychology* 2010;14(2):167-79.
11. Union IT. World Telecommunication/ ICT Indicators Database *17th edition* 2013
12. Service KSI. Statistics on Internet use. National Information Society Agency (2011) Internet Addiction Survey. *Agency NIS, Seoul, South Korea* 2013
13. Ministry of Culture S, and Tourism. Introduction of regulations of internet game in Korea. 2014
14. Choo H, Gentile DA, Sim T, et al. Pathological video-gaming among Singaporean youth. *Annals of the Academy of Medicine, Singapore* 2010;39(11):822-9. [published Online First: 2010/12/18]
15. Lemmens JS, Valkenburg PM, Gentile DA. The Internet Gaming Disorder Scale. *Psychological assessment* 2015;27(2):567-82. doi: 10.1037/pas0000062 [published Online First:

- 2015/01/07]
16. Gentile D. Pathological video-game use among youth ages 8 to 18: a national study. *Psychological science* 2009;20(5):594-602. doi: 10.1111/j.1467-9280.2009.02340.x [published Online First: 2009/05/30]
  17. Lam LT, Peng ZW, Mai JC, et al. Factors associated with Internet addiction among adolescents. *Cyberpsychology & behavior : the impact of the Internet, multimedia and virtual reality on behavior and society* 2009;12(5):551-5. doi: 10.1089/cpb.2009.0036 [published Online First: 2009/07/22]
  18. AmericanPsychiatricAssociation. Diagnostic and Statistical Manual of Mental Disorders (DSM-5). 2013
  19. Petry NM RF, Gentile DA, Lemmens JS, Rumpf H, Mößle T, et al. An international consensus for assessing Internet gaming disorder using the new DSM-5 approach. *Addiction* 2014;109(9):1399-406.
  20. Kim Y, Cheon, K., Kim,B., Chang, S., Yoo, H., & Kim, J. . The reliability and validity of Kiddie Schedule for Affective Disorders and Schizophrenia Present and Lifetime Version-Korean version (K-SADSPL-K). *Yonsei Medical Journal* 2004;45:81-89.
  21. Young KS. The research and controversy surrounding internet addiction. *Cyberpsychology & behavior : the impact of the Internet, multimedia and virtual reality on behavior and society* 1999;2(5):381-3. doi: 10.1089/cpb.1999.2.381 [published Online First: 1999/01/01]
  22. Kim DI JY, Lee EA, Kim DM, Joe YM. Development of Internet Addiction Proneness Scale - Short Form (KS-Scale). *Korean J Counseling* 2008;9:1703-22.
  23. Koo HJ, Han DH, Park SY, et al. The Structured Clinical Interview for DSM-5 Internet Gaming Disorder: Development and Validation for Diagnosing IGD in Adolescents. *Psychiatry investigation* 2017;14(1):21-29. doi: 10.4306/pi.2017.14.1.21 [published Online First: 2017/01/18]
  24. Kwon M, Kim DJ, Cho H, et al. The smartphone addiction scale: development and validation of a short version for adolescents. *PLoS one* 2013;8(12):e83558. doi: 10.1371/journal.pone.0083558 [published Online First: 2014/01/07]
  25. Kovacs M, Feinberg TL, Crouse-Novak MA, et al. Depressive disorders in childhood. I. A longitudinal prospective study of characteristics and recovery. *Archives of general psychiatry* 1984;41(3):229-37. [published Online First: 1984/03/01]
  26. Cho S. C.J. Development of State - Trait Anxiety Scale for Korean Children. *Medicine Journal of Seoul Natinal University* 1989;14(3):150-57.
  27. Spielberger CD. Manual for the State: Trait Anxiety Inventory for Children. *Palo Alto, Consulting Psychologist Press* 1972
  28. GJ. D. Parent and teacher ratings of ADHD symptoms: psychometric properties in a community-based sample. . *J Clin Child Psychol* 1990;20:245-53.
  29. Kim JW, Park KH, Cheon KA, et al. The child behavior checklist together with the ADHD rating scale can diagnose ADHD in Korean community-based samples. *Canadian journal of*



- 1  
2  
3  
4 *psychiatry Revue canadienne de psychiatrie* 2005;50(12):802-5. doi:  
5 10.1177/070674370505001210 [published Online First: 2006/01/18]  
6
- 7 30. Shaffer D, Fisher P, Lucas CP, et al. NIMH Diagnostic Interview Schedule for Children Version IV  
8 (NIMH DISC-IV): description, differences from previous versions, and reliability of some  
9 common diagnoses. *Journal of the American Academy of Child and Adolescent Psychiatry*  
10 2000;39(1):28-38. doi: 10.1097/00004583-200001000-00014 [published Online First:  
11 2000/01/19]  
12
- 13 31. First MB, Spitzer, R. L, Gibbon M, and Williams, J.B.W.. Structured Clinical Interview for DSM-IV-  
14 TR Axis I Disorders, Research Version, Research Edition. (SCID-I). *New York: Biometrics*  
15 *Research, New York State Psychiatric Institute* 2002  
16
- 17 32. Kroenke K, Spitzer RL, Williams JB. The PHQ-9: validity of a brief depression severity measure.  
18 *Journal of general internal medicine* 2001;16(9):606-13. [published Online First: 2001/09/15]  
19
- 20 33. Rosenberg M. Society and the adolescent self-image. *Princeton, NJ: Princeton*  
21 *University Press* 1965  
22
- 23 34. Gottfredson MR, & Hirschi,T. A generaltheory ofcrime. *Stanford, CA:StanfordUniversityPress*  
24 1990  
25
- 26 35. Buss AH, Perry M. The aggression questionnaire. *Journal of personality and social psychology*  
27 1992;63(3):452-9. [published Online First: 1992/09/01]  
28
- 29 36. Dubow EF, Tisak J. The relation between stressful life events and adjustment in elementary  
30 school children: the role of social support and social problem-solving skills. *Child*  
31 *development* 1989;60(6):1412-23. [published Online First: 1989/12/01]  
32
- 33 37. Bienvenu MJ. A parent-adolescent communicaiton inventory. *Saluda, NC: Family Life publictions*  
34 1969  
35
- 36 38. Grych JH, Seid M, Fincham FD. Assessing marital conflict from the child's perspective: the  
37 children's perception of interparental conflict scale. *Child development* 1992;63(3):558-72.  
38 [published Online First: 1992/06/01]  
39
- 40 39. Armsden GC, Greenberg MT. The inventory of parent and peer attachment: Individual  
41 differences and their relationship to psychological well-being in adolescence. *Journal of*  
42 *youth and adolescence* 1987;16(5):427-54. doi: 10.1007/bf02202939 [published Online First:  
43 1987/10/01]  
44
- 45 40. Gentile DA, Choo H, Liau A, et al. Pathological video game use among youths: a two-year  
46 longitudinal study. *Pediatrics* 2011;127(2):e319-29. doi: 10.1542/peds.2010-1353 [published  
47 Online First: 2011/01/19]  
48  
49  
50  
51  
52  
53  
54  
55  
56  
57  
58  
59  
60

Table 1. Measurement tools in each wave

| Categories               | Measures                                                | Source            | Wave    |    |    |    |
|--------------------------|---------------------------------------------------------|-------------------|---------|----|----|----|
|                          |                                                         |                   | T1      | T2 | T3 | T4 |
| Exposure                 | Exposure time to internet, smart phone, and online game | student/parents   | √       | √  | √  | √  |
|                          | Internet, smart phone, and online game using behaviors  | Student           | √       | √  | √  | √  |
| Diagnosis                | Young scale                                             | Student           | √       |    |    |    |
|                          | K-scale                                                 | Student           | √       |    |    |    |
|                          | IGUESS                                                  | Student           | √       | √  | √  | √  |
|                          | IGDS                                                    | Student           | √       |    | √  | √  |
|                          | SAS-SV                                                  | Student           | √       | √  | √  | √  |
| Psychiatric commorbidity | Depression (CDI)                                        | Student           | √       | √  | √  | √  |
|                          | Anxiety (TAIC)                                          | Student           | √       | √  | √  | √  |
|                          | K-ARS                                                   | Parents           | √       |    |    |    |
|                          | DISC-IV                                                 | Parents           | √       |    |    |    |
|                          | Sociality                                               | Student           | √       | √  | √  | √  |
|                          | PHQ-9                                                   | Parents           | √       |    |    |    |
|                          | Personal                                                | Self-esteem scale | student | √  |    |    |
|                          | Gottfredson' self-control                               | student           | √       |    |    |    |
|                          | Aggression Questionnaire                                | student           | √       | √  | √  | √  |
|                          | Demographic information                                 | student/parents   | √       |    |    |    |
|                          | Academic achievement                                    | Parents           | √       |    |    |    |
| Environmental            | School policy on having smart phone use in school       | student           | √       | √  | √  | √  |
|                          | PACI                                                    | student           | √       |    |    |    |
|                          | Marriage satisfaction                                   | Parents           | √       |    |    |    |
|                          | PAT                                                     | student/parents   | √       |    |    |    |
|                          | CPIC                                                    | student           | √       |    |    |    |
|                          | IPPA-R                                                  | student           | √       |    |    |    |
|                          | Perceived Parenting Competence                          | Parents           | √       |    |    |    |
| Social                   | Online gaming rule in home                              | Parents           | √       | √  | √  | √  |
|                          | Social network                                          | Student           | √       |    |    |    |
|                          | Bullying scale                                          | student           | √       |    |    |    |
|                          | SSAS                                                    | student           | √       |    |    |    |
| Health consequence       | Physical health                                         | student/parents   | √       |    |    |    |
|                          | Mental health                                           | students          | √       |    |    |    |

PACI: Parent-Adolescent Communication Inventory; SPEED: Standard Patients Evaluation of Eye Dryness Questionnaire; IPPA-R: Revised Inventory of Parent and Peer Attachment PACI: Parent-Adolescent Communication Inventory; AQ: Aggression Questionnaire; PAT: Parenting attitude test; CPIC: The Children's Perception of Inter-parental Conflict Scale; SSAS: Social Support Appraisal Scale

# BMJ Open

## Study Protocol of the Internet user Cohort for Unbiased Recognition of gaming disorder in Early Adolescence (iCURE), Korea, 2015–2019

|                                 |                                                                                                                                                                                                                                                                                                                                                                                                                                                                                                                                                                                                                                                                                                                                                                                                                                                                                                                                                                                 |
|---------------------------------|---------------------------------------------------------------------------------------------------------------------------------------------------------------------------------------------------------------------------------------------------------------------------------------------------------------------------------------------------------------------------------------------------------------------------------------------------------------------------------------------------------------------------------------------------------------------------------------------------------------------------------------------------------------------------------------------------------------------------------------------------------------------------------------------------------------------------------------------------------------------------------------------------------------------------------------------------------------------------------|
| Journal:                        | <i>BMJ Open</i>                                                                                                                                                                                                                                                                                                                                                                                                                                                                                                                                                                                                                                                                                                                                                                                                                                                                                                                                                                 |
| Manuscript ID                   | bmjopen-2017-018350.R1                                                                                                                                                                                                                                                                                                                                                                                                                                                                                                                                                                                                                                                                                                                                                                                                                                                                                                                                                          |
| Article Type:                   | Protocol                                                                                                                                                                                                                                                                                                                                                                                                                                                                                                                                                                                                                                                                                                                                                                                                                                                                                                                                                                        |
| Date Submitted by the Author:   | 27-Jul-2017                                                                                                                                                                                                                                                                                                                                                                                                                                                                                                                                                                                                                                                                                                                                                                                                                                                                                                                                                                     |
| Complete List of Authors:       | Jeong, Hyunsuk; Catholic University of Korea School of Medicine<br>Yim, Hyun Woo; College of Medicine, The Catholic University of Korea, Department of Preventive Medicine<br>Jo, Sun Jin; College of Medicine, The Catholic University of Korea, Preventive Medicine<br>Lee, Seung-Yup ; Catholic University of Korea School of Medicine<br>Kim, Eunjin; Catholic University of Korea School of Medicine<br>Son, Hye Jung; Catholic University of Korea School of Medicine<br>Han, Hyun-ho; Catholic University of Korea School of Medicine<br>Lee, Hae Kook; Catholic University of Korea School of Medicine<br>Kweon, Yong-Sil ; Catholic University of Korea School of Medicine<br>Bhang, Soo-young ; Eulji Hospital<br>Choi, Jung-Seok ; Seoul National University Seoul Metropolitan Government Boramae Medical Center<br>Kim, Bung-Nyun ; Seoul National University College of Medicine<br>Gentile, Douglas A. ; Iowa State University<br>Potenza, Marc; Yale University |
| <b>Primary Subject Heading</b>: | Mental health                                                                                                                                                                                                                                                                                                                                                                                                                                                                                                                                                                                                                                                                                                                                                                                                                                                                                                                                                                   |
| Secondary Subject Heading:      | Addiction                                                                                                                                                                                                                                                                                                                                                                                                                                                                                                                                                                                                                                                                                                                                                                                                                                                                                                                                                                       |
| Keywords:                       | Internet gaming disorder, adolescents, cohort, protocol                                                                                                                                                                                                                                                                                                                                                                                                                                                                                                                                                                                                                                                                                                                                                                                                                                                                                                                         |
|                                 |                                                                                                                                                                                                                                                                                                                                                                                                                                                                                                                                                                                                                                                                                                                                                                                                                                                                                                                                                                                 |

SCHOLARONE™  
Manuscripts

1  
2  
3  
4  
5  
6  
7  
8  
9  
10  
11  
12  
13  
14  
15  
16  
17  
18  
19  
20  
21  
22  
23  
24  
25  
26  
27  
28  
29  
30  
31  
32  
33  
34  
35  
36  
37  
38  
39  
40  
41  
42  
43  
44  
45  
46  
47  
48  
49  
50  
51  
52  
53  
54  
55  
56  
57  
58  
59  
60

## Study Protocol of the Internet user Cohort for Unbiased Recognition of gaming disorder in Early Adolescence (iCURE), Korea, 2015–2019

Hyunsuk Jeong, PhD<sup>1</sup>, Hyeon Woo Yim, MD, PhD<sup>1\*</sup>, Sun-Jin Jo, PhD<sup>1</sup>, Seung-Yup Lee, MD<sup>2</sup>,  
Eunjin Kim, BS<sup>1</sup>, Hye Jung Son, BA<sup>1</sup>, Hyun-ho Han, BA<sup>1</sup>,  
Hae Kook Lee, MD, PhD<sup>2</sup>, Yong-Sil Kweon, MD, PhD<sup>2</sup>, Soo-young Bhang, MD, PhD<sup>3</sup>,  
Jung-Seok Choi, MD, PhD<sup>4</sup>, Bung-Nyun Kim, MD, PhD<sup>5</sup> Douglas A. Gentile, PhD<sup>6</sup>,  
Marc N. Potenza, MD, PhD<sup>7</sup>

<sup>1</sup>. Department of Preventive Medicine, College of Medicine, The Catholic University of Korea, Seoul, Korea

<sup>2</sup>. Department of Psychiatry, College of Medicine, The Catholic University of Korea, Seoul, Korea

<sup>3</sup>. Department of Psychiatry, College of Medicine, Eulji University, Seoul, Korea

<sup>4</sup>. Department of Psychiatry, SMG-SNU Boramae Medical Center, Seoul, Korea

<sup>5</sup>. Department of Psychiatry, Seoul National University College of Medicine, Seoul, Korea

<sup>6</sup>. Department of Psychology, Iowa State University, Iowa, USA

<sup>7</sup>. Department of Psychiatry, Yale University, Iowa, USA

### Corresponding author:

Name: Hyeon Woo Yim, MD, PhD

Address: Department of Preventive Medicine, College of Medicine, The Catholic University of Korea, 222 Banpodero, Seochogu, Seoul, Korea

Tel: +82-2-2258-7860

Fax: +82-2-532-3820

E-mail: [y1693@catholic.ac.kr](mailto:y1693@catholic.ac.kr)

## Abstract

### Introduction:

In 2013, the Diagnostic and Statistical Manual of Mental Disorders, Fifth Edition (DSM-5) proposed nine internet gaming disorder (IGD) diagnostic criteria as a condition warranting further empirical and clinical research. The aim of this study is to clarify the natural and clinical courses of IGD proposed DSM-5 in adolescents and to evaluate its risk and protective factors.

### Method and analysis:

The Internet user Cohort for Unbiased Recognition of gaming disorder in Early Adolescence (iCURE) study is an ongoing multidisciplinary, prospective, longitudinal cohort study conducted in 21 schools in Korea. Participant recruitment commenced in March 2015 with the goal of registering 3,000 adolescents. The baseline assessment included surveys on emotional, social, and environmental characteristics. A parent or guardian completed questionnaires and a structured psychiatric comorbidity diagnostic interview regarding their children. Adolescents with the Internet Game Use-Elicited Symptom Screen (IGUESS) total scores of 6 or higher were asked to participate in the clinical diagnostic interview. Two sub-cohorts of adolescents were constructed: a representative sub-cohort and a clinical evaluation sub-cohort. The representative sub-cohort comprises a randomly selected 10% of the iCURE to investigate the clinical course of IGD based on clinical diagnosis and to estimate the false negative rate. The clinical evaluation sub-cohort comprised participants meeting three or more of the nine IGD criteria, determined by clinical diagnostic interview, to show the clinical course of IGD. Follow-up data will be collected annually for the three years following the baseline assessments. The primary endpoint is two-year incidence, remission, and recurrence rates of IGD. Cross-sectional and longitudinal associations between exposures and outcomes as well as mediation factors will be evaluated.

1  
2  
3  
4 Ethics and dissemination: This study is approved by the Institutional Review Board of The  
5  
6 Catholic University of Korea. Results will be published in peer-reviewed journals. This  
7  
8 study's protocol is registered at clinicaltrials.gov (identifier: NCT02415322).  
9  
10  
11  
12  
13  
14  
15  
16  
17  
18  
19

### 20 **Article summary**

#### 21 Strengths and limitations of this study

- 22 ● Internet gaming disorder (IGD) was assessed by using both polychotomous and  
23 dichotomous tools based on the nine DSM-5 IGD criteria. In addition, we are  
24 conducting structured interviews using DISC-IV of the parents or guardians to assess  
25 participant psychiatric comorbidities.  
26  
27
- 28 ● This study is that the clinical diagnosis of IGD based on the DSM-5 is performed by  
29 qualified mental health specialists.  
30  
31
- 32 ● It is not a representative sample because the registration was conducted among the  
33 schools in the specific area.  
34  
35
- 36 ● The participants were included only 3<sup>rd</sup>-, 4<sup>th</sup>-, and 7<sup>th</sup>-grade students.  
37  
38  
39  
40  
41  
42  
43  
44  
45  
46  
47  
48  
49  
50  
51  
52  
53  
54  
55  
56  
57  
58  
59  
60

## Introduction

Internet games are popular entertainment in modern society, with a variety of people of different ages participating in gaming. Internet game play rates and sales are increasing<sup>1</sup>.

Players choose to play games for many reasons, including fun, recreation, coping with stress, sociability, and escaping real life<sup>2-4</sup>. The gaming research literature has reported both positive and negative effects on players. Playing games promotes problem solving and visual, motor, and spatial skills, and it fosters interaction with friends<sup>5</sup>. Although there are several positive effects of playing games for adolescents, there can also be negative effects, such as the possibility of problematic or addictive gaming<sup>6</sup>. Gaming has been associated with inattention and hyperactivity, aggressive behaviors, negative emotions including depression<sup>7,8</sup>, low self-esteem, social anxiety, loneliness<sup>9</sup>, and low psychological well-being<sup>10</sup>.

South Korea is one of the most highly digitalized societies in the world. The Internet penetration rate in South Korea exceeded 75% in 2011<sup>11</sup>. More than half of people in their 50s and almost 100% of teenagers use the Internet in their daily lives<sup>12</sup>. Korea has developed a computer industry with Internet use reaching over 50% of the population. Currently, in Korea, 25 million among 45 million citizens use the Internet, and 14.4 million homes are equipped with Internet access. In addition to home access, many people visit “PC rooms”, a type of gaming center with a broad-band Internet network that is equipped with the best performance computers in Korea. PC rooms became popular following the release of the PC game StarCraft in 1998, with an estimated 25,000 PC rooms nationwide in 2014. ‘PC rooms’ have no any age restrictions on accessibility, and many adolescents often play online games<sup>13</sup>.

A 2010 nation-wide survey regarding Internet addiction showed that 8.0% of the Korean population and 12.4% of adolescents were addicted to Internet use, as assessed via the self-administered K-scale<sup>12</sup>. This prevalence is a little higher than has been found in other countries, such as Singapore (8.7%)<sup>14</sup>, the Netherlands (6.8%)<sup>15</sup>, the US (8.5%)<sup>16</sup>, and

1  
2  
3  
4 China (10.8%)<sup>17</sup>. The higher prevalence in Korea could be expected, given that it is a country  
5  
6 with such broad and easy access. Although the number of Internet game users has increased  
7  
8 dramatically over the last decade, the phenomenon of Internet gaming addiction is not yet  
9  
10 well understood, and research on its etiology and natural history is still in its infancy. Studies  
11  
12 have used various tools to estimate the prevalence of Internet gaming disorder (IGD), but the  
13  
14 lack of common diagnostic criteria for IGD has created difficulties in comparing studies.

15  
16  
17 In May 2013, IGD was included in Section III of the DSM-5 as a condition warranting  
18  
19 further study<sup>18</sup>. This marked the first occasion of IGD being formally recognized as a mental  
20  
21 health disorder and suggested IGD classification criteria have paved the way for measuring  
22  
23 IGD in a consistent manner. These suggestions enable more direct comparisons of findings  
24  
25 and may be used to eventually reach a consensus on the status of the disorder<sup>19</sup>. The DSM-5  
26  
27 proposes nine criteria for IGD, and it states explicitly that the specific criteria and the  
28  
29 threshold for diagnosis require systematic investigation and empirical validation before their  
30  
31 wide-scale adoption. The proposed criteria apply only to Internet gaming, and not general  
32  
33 Internet use, which can differ in terms of presenting symptoms, etiology, comorbidities,  
34  
35 course, and treatment. Empirical data are required to ascertain the extent to which these  
36  
37 criteria apply to various populations and to aid diagnosis.

38  
39  
40  
41 However, the classification and rationale for DSM-5 IGD as a mental health disorder have  
42  
43 been controversial<sup>20</sup>. A previous study ~~was~~ proposed the possibilities that gaming behavior  
44  
45 can be common behavior or leisure activity. Excessive involvement on gaming per se, ~~that~~  
46  
47 might reflect engagement, passion, or coping<sup>21</sup>. Excessive behaviors on gaming can be  
48  
49 transient for many adolescents and we will look into whether excessive behavior on gaming  
50  
51 is episodic or steady through the longitudinal observation. It is also argued that several IGD  
52  
53 criteria such as withdrawal and tolerance are often inappropriate to be put into the  
54  
55 conceptualization of behavioral addiction and difficult to apply convincingly and measure in  
56  
57  
58  
59  
60



1  
2  
3  
4 relation to behaviors<sup>22</sup>. In addition, a previous study did not support the hypothesis that the  
5  
6 nine DSM-5 IGD criteria had the same validity for the diagnosis<sup>23</sup>. To this end, we registered  
7  
8 and began a prospective school-based cohort study of adolescents to provide evidence  
9  
10 regarding the IGD diagnostic criteria by clarifying the characteristics of IGD's natural history.  
11  
12 Given the broad discussion of a replicability "crisis" in many sciences, it is valuable to  
13  
14 document *a priori* our research methods, goals, and planned approach.  
15  
16  
17  
18  
19

## 20 Aims

21 The aim of the study is to clarify the natural and clinical courses of IGD based on the DSM-5  
22  
23 diagnostic criteria, to provide evidence for empirical validation of the suggested IGD  
24  
25 diagnostic criteria, and to further evaluate the etiological risk and predictive factors in  
26  
27 adolescents.  
28  
29  
30  
31  
32

## 33 Methods

### 34 Study design and setting

35  
36 The Internet user Cohort for Unbiased Recognition of gaming disorder in Early Adolescence  
37  
38 (iCURE) study is a multidisciplinary, prospective, longitudinal cohort study of 3,000  
39  
40 adolescents, conducted in Korea, with 4 waves of annual data collection currently planned.  
41  
42 The study is being conducted in Seoul and Uijeongbu, Gyeonggi Province, with 3<sup>rd</sup>-, 4<sup>th</sup>-, and  
43  
44 7<sup>th</sup>-grade students in 6 primary schools and 19 secondary schools participating. Participation  
45  
46 requires consent from the participants as well as written parental consent following  
47  
48 explanation of the nature of the principles of research, including confidentiality and the  
49  
50 freedom of choice to participate. The study was fully reviewed and approved by the  
51  
52 Institutional Review Board of The Catholic University of Korea (MC140NM10085) and was  
53  
54 conducted in accordance with the Declaration of Helsinki.  
55  
56  
57  
58  
59  
60

## Pretest and pilot test of methods

We validated the feasibility of the study before beginning data collection by performing a pretest and a pilot test. For the pretest, we recruited a convenience sample of 25 3<sup>rd</sup>- and 4<sup>th</sup>-grade students to test the understandability of the questionnaires for this age group of students.

We performed a pilot test to verify that the overall survey system worked well, with participants composed of one school class of 35 students. They completed all baseline measures which were recruited outside of the sampling frame.

## Recruitment

Participant recruitment commenced in March 2015. Recruitment took place at the school level. We sent official letters to all primary and secondary schools in three educational districts to invite their participation. After school principles provided consent for their schools to participate, the parents or guardians were contacted to obtain consent for their children to participate in the study. A total of 21 schools (6 elementary and 19 secondary) participated in the study, out of 258 schools (163 elementary and 95 secondary) in the three districts. In order to encourage participation in this research, the research team members visited the 21 participating schools to provide a seminar that presented the aims of the study and provided additional information about the research project to teachers and parents. The final enrollment is expected to be 3,000 adolescents. Three regional hospitals were designated in the three areas where the participating schools are located to provide treatment options for adolescents experiencing IGD.

## Inclusion and exclusion criteria

The inclusion criteria were that the participants were 3<sup>rd</sup>-, 4<sup>th</sup>-, or 7<sup>th</sup>-grade students at

1  
2  
3  
4 baseline. We required that each student participant had a parent or guardian who also  
5  
6 participated in the study. The exclusion criteria included lack of competence in the Korean  
7  
8 language by the parent or guardian and intellectual disability of the adolescent.  
9

#### 10 11 12 Data collection

13  
14 The participants completed questionnaires at baseline and will again annually for the  
15  
16 following three years. The baseline assessments started in May 2015. We are collecting data  
17  
18 from multiple informants, including students' self-report questionnaires, clinical diagnostic  
19  
20 interviews of the students, parents' or guardians' self-report questionnaires, and structured  
21  
22 clinical interviews of the parents or guardians regarding any psychiatric comorbidity in their  
23  
24 children.  
25  
26  
27  
28  
29

#### 30 31 Follow-up and retention strategy

32  
33 In an effort to maintain contact with iCURE study participants, we will send individual  
34  
35 reports annually via registered mail, and we will periodically send text messages about  
36  
37 general contents via cell phone to the participants. Once a year, we will send each  
38  
39 participant's survey results to their parents via registered mail, which will be called a "mental  
40  
41 health signal." This will include the mental health status regarding symptoms of Internet  
42  
43 game addiction, depression, anxiety, and ADHD, marked as red, yellow, and green traffic  
44  
45 signals, indicating symptom severity as assessed by both the self-report survey and the  
46  
47 clinical diagnosis. We will also provide referrals for treatment availability.  
48  
49

50  
51 During this study, we are operating a 24-hour counseling helpline for the parents and  
52  
53 guardians. A clinical psychologist with more than 10 years of clinical experience specializing  
54  
55 in children and adolescents is conducting telephone consultations. This telephone counseling  
56  
57 is free and anonymous, providing parents with general counseling about their children, as  
58  
59  
60

1  
2  
3  
4 well as specific counseling regarding gaming addiction.  
5  
6  
7

### 8 *Student self-report questionnaires*

9  
10 Student data collection is conducted at the schools during school hours. The 7<sup>th</sup>-grade students  
11 complete questionnaires using a web-based self-administration method. The 3<sup>rd</sup>- and 4<sup>th</sup>-grade  
12 students complete the questionnaires in a class setting; a research assistant reads the questions  
13 aloud, following a standard script, to aid comprehension and diminish time demands. In later  
14 waves, all students will complete the questionnaires on their own, with a supervising research  
15 assistant available to answer questions. During the baseline assessment, the questionnaires  
16 took approximately 90–120 minutes to complete; later waves will take approximately 45–80  
17 minutes. The student data collection at later waves will also be conducted at the schools  
18 during school hours. For students who transfer to other schools, arrangements will be made to  
19 complete the follow-up questionnaires, either by visiting their homes or via website access.  
20  
21  
22  
23  
24  
25  
26  
27  
28  
29  
30  
31  
32  
33  
34

### 35 *Interviewing parents*

36  
37 At baseline, each parent or guardian completed a questionnaire and the Diagnostic Interview  
38 Schedule for Children, Version 4 (DISC-IV). The DISC-IV is a highly structured diagnostic  
39 interview used to assess psychiatric disorders in children and adolescents. We are including 7  
40 of the 34 diagnostic assessments: generalized anxiety disorder, separation anxiety, obsessive-  
41 compulsive disorder, major depression disorder, attention deficit disorder and attention deficit  
42 hyperactive disorder (ADD/ADHD), oppositional defiant disorder, and conduct disorder.  
43  
44  
45  
46  
47  
48  
49

50 The DISC-IV was administered by trained interviewers at the participants' homes or at a  
51 private space at the school, based on the participant's preference. The parent questionnaire  
52 contained demographic questions and took 20 to 30 minutes to complete, and the DISC-IV  
53 took 40 to 90 minutes. Parent or guardian survey is conducting only at baseline.  
54  
55  
56  
57  
58  
59  
60

### *Second-stage clinical diagnosis by mental health professionals*

The clinical diagnostic interviews for IGD were conducted face-to-face by five psychiatrists and four Master's degree-level clinical psychologists with at least five years of training and clinical experience. The interviews assessed participants based on the nine DSM-5 IGD criteria, in accordance with the international consensus for IGD represented in the DSM-5<sup>19</sup>. Diagnoses were based on clinically significant functional impairments that substantially derived from gaming and not from any other psychiatric illnesses. Any psychiatric comorbidities were also thoroughly evaluated by the psychiatrists using the semi-structured tool of the Kiddie-Schedule for Affective Disorders and Schizophrenia-Present and Lifetime Version-Korean version (K-SADS-PL), which has been previously validated in Korean<sup>24</sup>. Global functioning was assessed using the Children's Global Assessment Scale (GAS), based on the child's worst level of emotional and behavioral functioning in the past three months. The criterion for a second-stage clinical diagnosis is an Internet Game Use-Elicited Symptom Screen (IGUESS) total score of 6 or higher, either at baseline or at the follow-up waves. Additionally, random selection of 10% of the full cohort, stratified by the school, completed the clinical diagnostic interviews at baseline and the further follow-up waves. Anyone who responds insincerely with marking all of the same numbers to the IGUESS at every wave will be excluded to rule out false negatives. Anyone who reports a suicidal experience during the past year at any wave will be given diagnostic interviews. The clinical diagnostic interviews are being conducted one week after completion of the baseline study. The interviews are being conducted confidentially in private spaces at the participants' schools.

### *Sub-cohorts*

Two sub-cohorts have been constructed. A representative sub-cohort consists of a randomly

1  
2  
3  
4 selected 10% of adolescents in the cohort. They will participate in the clinical diagnostic  
5  
6 interview every year to estimate the false negative rate and to evaluate the clinical course of  
7  
8 DSM-5–defined IGD based on clinical diagnosis. Additionally, a clinical evaluation sub-  
9  
10 cohort is comprised of those meeting three or more of the nine IGD criteria, as determined by  
11  
12 the clinical diagnostic interview at baseline and at each follow-up wave. The reason why they  
13  
14 were selected as a clinical evaluation sub-cohort was to observe the natural history or clinical  
15  
16 course of them even though they did not reach the DSM-5 IGD diagnostic criteria. Following  
17  
18 up this sub-cohort may reveal whether they actually turned out to be IGD or normal behavior.  
19  
20 The interviews will be conducted annually for 3 years to observe the clinical history,  
21  
22 remission, and recurrence rates.  
23  
24  
25  
26  
27

## 28 Measurement

29  
30 The measurements using i-CURE are presented in Table 1.

### 31 32 *Demographic information*

33  
34 Demographic characteristics were assessed at baseline. Sex, date of birth, family composition,  
35  
36 and number of siblings were obtained from the student assessment, and parental education  
37  
38 level, socio-economic status, parental marital status, parental education level, and parental  
39  
40 job were obtained from the parent or guardian assessments.  
41  
42

### 43 44 *Internet, gaming, and smartphone use*

45  
46 Comprehensive assessments of participants' Internet, gaming, and smartphone usage were  
47  
48 performed, including questions regarding the first time of exposure, the average daily time  
49  
50 spent online, and gaming-related questions, such as online gaming type preference and  
51  
52 weekly playing time. We classified online games as role-playing games, shooter games,  
53  
54 simulation games, arcade games, and unknown.  
55  
56

### 57 58 *Regulated usage of smartphones or games*

1  
2  
3  
4 We assess school policies on possession and usage of smartphones and domestic regulations  
5 of smartphone or game time.  
6  
7

#### 8 *Internet Addiction Test (IAT)*

9  
10 Young's IAT consists of 20 items rated on a 5-point Likert scale from *rarely* (1) to *always* (5),  
11 with higher scores indicating more severe Internet addiction <sup>25</sup>.  
12

#### 13 *Korean Scale for Internet Addiction (K-Scale)*

14  
15 To assess Internet addiction, we use the K-Scale-short form for adolescents, which were  
16 developed in Korea. It is comprised of 20 items rated on a 4-point Likert scale, from 1 (*not at*  
17 *all*) to 4 (*always*)<sup>26</sup>.  
18  
19

#### 20 *Internet Game Use-Elicited Symptom Screen (IGUESS)*

21  
22 This instrument was created based on the nine DSM-5 IGD criteria. Students are instructed to  
23 respond based on their gaming behavior within the last 12 months, with each item rated on a  
24 4-point scale: 1=*strongly disagree*, 2=*somewhat disagree*, 3=*somewhat agree*, 4=*strongly*  
25 *agree*).  
26  
27

#### 28 *Self-reported version of structured clinical interview for Internet Gaming Disorder (SR-IGD)*

29  
30 We use the SR-IGD to assess IGD with respect to occurrences over the past 6 months. The  
31 assessment uses yes-or-no questions <sup>27</sup>.  
32  
33

#### 34 *Short version of the Smartphone Addiction Scale (SAS-SV)*

35  
36 We assessed smartphone addiction using the short version of the Smartphone Addiction Scale  
37 (SAS-SV). The SAS-SV addresses the following 5 content areas with respect to the previous  
38 year: (1) daily-life disturbance, (2) withdrawal, (3) cyberspace-oriented relationship, (4)  
39 overuse, and (5) tolerance. It contains 10 items rated on a dimensional scale (1=*strongly*  
40 *disagree* to 6=*strongly agree*). The total scores range from 10 to 60, with the higher scores  
41 indicating greater degrees of smartphone addiction <sup>28</sup>.  
42  
43

#### 44 *Children's Depression Inventory (CDI)*

1  
2  
3  
4 The Children's Depression Inventory (CDI) is a 27-item, self-rated, symptom-oriented scale  
5 suitable for youths aged 7 to 17 years. It assesses cognitive, affective, somatic, and behavioral  
6 symptoms, with items scored from 0 to 2, where 0 means *the symptom is not present*, 1 means  
7 *the symptom is present and mild*, and 2 means *the symptom is present and marked*<sup>29</sup>.  
8  
9

#### 10 11 12 *Trait Anxiety Inventory for Children (TAIC)*

13  
14 To examine trait anxiety, we used the Korean translation<sup>30</sup> of the Trait Anxiety Inventory for  
15 Children (TAIC), which is part of the State-Trait Anxiety Inventory for Children (STAIC)  
16 developed by Spielberger and colleagues (1973). The Korean TAIC is a 20-item inventory  
17 that asks respondents to indicate how frequently, on a 3-point scale (1=*almost never* to  
18 3=*almost always*), they feel worried, bothered, or nervous<sup>31</sup>..  
19  
20  
21  
22  
23  
24  
25

#### 26 *Korean version of the ADHD Rating Scale (K-ARS)*

27  
28 The Korean version of the ADHD Rating Scale (K-ARS) was used to assess ADHD which  
29 was originally developed by DuPaul<sup>32</sup>. The K-ARS is a scale for ADHD symptom severity  
30 composed of 18 items (9 items for inattention and 9 items for hyperactivity) scored from as 0  
31 (*never or rarely*) to 3 (*very often*)<sup>33</sup>.  
32  
33  
34  
35  
36

#### 37 *Diagnostic Interview Schedule for Children, Version IV (DISC-IV)*

38  
39 In the current study, the DISC-IV was administered by a trained interviewer. The DISC-IV is  
40 comprised of six domains of possible impairment present during a "time in the last year when  
41 symptoms caused the most problems." These domains are (1) getting along with parent  
42 caretakers, (2) participating in family activities, (3) participating in peer activities, (4)  
43 academic/occupational functioning, (5) relationships with teachers, and (6) distress  
44 attributable to symptoms. Each set of questions has a 2-part structure, the first determining  
45 whether impairment is present, and the second measuring severity or frequency. We selected  
46 an introductory module that includes demographic information (age, grade, names and ages  
47 of siblings, and identification of caretakers and attachment figures). The remainder of the  
48  
49  
50  
51  
52  
53  
54  
55  
56  
57  
58  
59  
60



1  
2  
3  
4 interview is organized into 3 modules, each containing related diagnoses (anxiety, mood, and  
5  
6 disruptive disorders)<sup>34</sup>.  
7

#### 8 *Presence of suicidal ideation, suicide plans, and suicide attempts*

9  
10 The presence of suicidal ideation, suicide plans, and suicide attempts is determined using the  
11  
12 following direct questions derived from the Structured Clinical Interview for DSM-IV Axis I  
13  
14 Disorders (SCID-I). Participants are asked whether they had seriously considered committing  
15  
16 suicide, made a plan to commit suicide, or attempted suicide during the past year. The  
17  
18 presence or absence of suicide ideation, plans, and attempts is based on the subject response  
19  
20  
21 (yes or no)<sup>35</sup>.  
22  
23

#### 24 *Patient Health Questionnaire (PHQ-9)*

25  
26 The PHQ-9 is a multipurpose instrument that assists in screening, diagnosing, and monitoring  
27  
28 depression severity. It incorporates the DSM-IV depression diagnostic criteria with other  
29  
30 leading major depressive symptoms into a brief nine-item, self-report tool. Respondents rate  
31  
32 the frequency of the symptoms over the last 2 weeks on a 4-point rating scale (*not at all* = 0;  
33  
34 *several days* = 1; *more than half of the days* = 2; *nearly every day* = 3)<sup>36</sup>.  
35  
36

#### 37 *Rosenberg's Self-Esteem Scale*

38  
39 Rosenberg's Self-Esteem Scale has 10 items, each rated on a 5-point Likert scale, ranging  
40  
41 from 1 (*strongly disagree*) to 5 (*strongly agree*). The total score ranges from 10 to 50<sup>37</sup>.  
42  
43

#### 44 *Self-Control Scale*

45  
46 Self-Control Scale is defined by Gottfredson and Hirschi (1990)<sup>38</sup>. The 20-item scale is  
47  
48 divided into two self-control constructs: immediate and delayed satisfaction. Each item is  
49  
50 rated on a 4-point scale: (4) *strongly agree*, (3) *agree somewhat*, (2) *disagree somewhat*, and  
51  
52 (1) *strongly disagree*. Higher scores indicate lower self-control.  
53  
54

#### 55 *Aggression Questionnaire (AQ)*

56  
57 The Buss-Perry Aggression Questionnaire is a 29-item scale that measure four aspects of  
58  
59  
60

1  
2  
3  
4 human aggression and hostile personality. Participants rate each item using a 5-point Likert  
5 scale from 1 (*uncharacteristic of me*) to 5 (*very characteristic of me*)<sup>39</sup>.

6  
7  
8 *Social Support Appraisals Scale: Child's Subjective Appraisal of Family, Peer, and Teacher*  
9 *Support (SSAS)*

10  
11 We use the Social Support Appraisals Scale: Child's Subjective Appraisal of Family, Peer,  
12 and Teacher Support (SSAS) to address the adolescent participants' perceived support. It is a  
13 41-item self-report instrument developed by Dubow et al. (1989)<sup>40</sup>. Items are rated on a 5-  
14 point Likert scale, from 1 (*never*) to 5 (*always*).

15  
16  
17 *Parent-Adolescent Communication Inventory (PACI)*

18  
19 The Parent-Adolescent Communication Inventory (PACI) is a 40-item inventory used to  
20 assess communication in the parent-adolescent relationship. There are two forms of the  
21 inventory, one for parents and the other for adolescents. Scores range from 0 to 120, with  
22 higher scores reflecting a greater degree of parent-adolescent communication<sup>41</sup>.

23  
24 *The Children's Perception of Interparental Conflict Scale (CPIC)*

25  
26 The CPIC uses a multiple-choice format with three possible responses: *true*, *sort of true*, and  
27 *false*. Items are scored from 1 to 3, with 3 reflecting more negative forms of conflict and their  
28 appraisal<sup>42</sup>.

29  
30  
31 *Revised Inventory of Parent and Peer Attachment (IPPA-R)*

32  
33 The original IPPA was developed by Armsden and Greenberg (1987) to assess adolescents'  
34 perceptions of the positive and negative affective and cognitive dimensions of relationships  
35 with their parents and close friends. In particular, the inventory examines how well these  
36 figures serve as sources of psychological security. Three broad dimensions are assessed:  
37 degree of mutual trust, quality of communication, and alienation. Participants are asked to  
38 rate each of the items on a 5-point Likert-scale from 1 (*never true*) to 5 (*always true*)<sup>43</sup>.

39  
40  
41 *Physical and mental health status*

1  
2  
3  
4 We assess physical pain experiences, such as in the hand, wrist, shoulder, or neck; dry eyes;  
5  
6 drinking and smoking habits during the past year; histories of physical illness, including  
7  
8 rheumatoid arthritis, lupus, diabetes mellitus; and psychiatric illness, including depression,  
9  
10 anxiety disorders, and ADHD. We also ask about sleep hours during the week and during  
11  
12 weekends.  
13

#### 14 15 16 17 Sample size estimation

18  
19 We calculated the study sample size required to investigate whether overuse of Internet  
20  
21 gaming is a risk factor of IGD presence at the 2-year follow up. For a 15% prevalence of  
22  
23 exposure to 3 or more hours per day of Internet gaming, a 5% incidence of IGD at the 2-year  
24  
25 follow-up period, a relative risk of this risk factor for IGD of 2 (RR=2.0), and setting  $\alpha$  at  
26  
27 0.05 and  $\beta$  at 0.20 (power of 0.80), a sample size of 2,559 is required. Considering a dropout  
28  
29 rate of 14%, the required sample size is estimated to be almost 3,000. We expect there will be  
30  
31 150 adolescents at high-risk for IGD (meeting 3 or more of the 9 DSM-5 IGD criteria) among  
32  
33 the 3,000 participants at baseline, and we estimate that 75 new IGD cases will be found at the  
34  
35 2-year follow-up<sup>44</sup>.  
36  
37  
38  
39  
40  
41

#### 42 Strategies to minimize error and bias

##### 43 44 *Online assessment system*

45  
46 The participants log onto the study's website with unique authentication codes provided,  
47  
48 where they complete the online questionnaires. We use a branched algorithmic structure to  
49  
50 enhance the confidentiality and accuracy of responses and to reduce the risk of exposing  
51  
52 sensitive information.  
53

##### 54 55 *Training of the interviewers*

56  
57 To administer the parent-guardian surveys, we recruited psychologists and nurses with  
58  
59  
60

1  
2  
3  
4 Bachelor's or Master's degrees, and the research team provided them with training that  
5  
6 included information on Internet gaming addiction and communication skills, through a 2-day  
7  
8 (16-hour) training workshop. In addition to administering the surveys, the interviewers  
9  
10 reported on the status of the data collection and any problems and issues arising during the  
11  
12 interviews, at mandatory weekly meetings.  
13

14  
15 Prior to the diagnostic interviews and twice each year, all psychiatrists and clinical  
16  
17 psychologists attend a seminar about IGD diagnosis to increase inter-rater reliability and  
18  
19 diagnostic agreement. In the seminar, we review recent papers on IGD diagnosis and provide  
20  
21 mock cases in a video to enhance diagnostic concordance. Also, at the end of each day of  
22  
23 diagnostic interviews, all psychiatrists and clinical psychologists who participate in the  
24  
25 clinical diagnosis attend a case conference to discuss any ambiguous diagnoses and make  
26  
27 final determinations.  
28  
29

### 30 31 32 33 Statistical analyses plan

34  
35 We will calculate the 2-year incidence, remission, and recurrence rates of IGD, with 95%  
36  
37 confidence intervals. We will investigate the cross-sectional and longitudinal associations  
38  
39 between exposures and outcomes using a logistic or linear regression model or a generalized  
40  
41 linear model, as appropriate. Models will include exposures to games, such as time spent  
42  
43 playing games, types of Internet games, and gaming-related activities, with IGD as the  
44  
45 outcome variable and covariates including socio-demographic, personal, social, and  
46  
47 environmental factors. Moderation tests will examine for differences in associations and  
48  
49 mediation tests will assess indirect effects based on socio-demographic, personal, social, and  
50  
51 environmental factors.  
52  
53  
54  
55

### 56 57 58 **Ethics and dissemination**

1  
2  
3  
4 All procedures performed in studies involving human participants were in accordance with  
5  
6 the ethical standards of the Institutional Review Board of The Catholic University of Korea  
7  
8 (approval number: MC140NM10085) and with the 1964 Helsinki declaration and its later  
9  
10 amendments or comparable ethical standards. Written consent was received from all  
11  
12 participants and from one of the participants' parents or caregivers following an explanation  
13  
14 of the study, including confidentiality and freedom of choice to participate. All results will be  
15  
16 published in relevant peer-reviewed international scientific journals and presented at conferences, nationally and  
17  
18 internationally.  
19  
20  
21

## 22 23 **Discussion**

24  
25 A major strength of this study is that it is conducted in a county with a particularly high  
26  
27 burden of IGD in adolescents. Korea has a high likelihood of exposure to games because  
28  
29 Korea plays a leading role in the development of the game industry and is one of the most  
30  
31 highly digitalized societies in the world. It provides a high-access environment for Internet  
32  
33 gaming, including PC rooms, which have broad-band Internet networks and are equipped  
34  
35 with the best performance computers in Korea. This makes Korea an optimal place to  
36  
37 perform a cohort study to characterize IGD.  
38  
39

40  
41 We are screening 3<sup>rd</sup>-, 4<sup>th</sup>-, and 7<sup>th</sup>-grade students for IGD using both polychotomous and  
42  
43 dichotomous tools based on the nine DSM-5 IGD criteria. In addition, we are conducting  
44  
45 structured interviews using DISC-IV of the parents or guardians to assess participant  
46  
47 psychiatric comorbidities. Because the participants are early adolescents, we obtained their  
48  
49 mental health status through their parents or guardians. Self-reports can include false or  
50  
51 insincere reports, making evaluation of the IGD risk factors less accurate. To reduce this  
52  
53 effect, we have added a reverse scale to each self-report questionnaire.  
54  
55

56  
57 Another strength of this study is that the clinical diagnosis of IGD based on the DSM-5 is  
58  
59  
60

1  
2  
3  
4 performed by qualified mental health specialists. Most prior studies have not been able to  
5  
6 also get a true clinical diagnosis along with the screening tool scores, so this study will  
7  
8 provide needed validity data. Participants included those considered positive for IGD, defined  
9  
10 as scores of 6 or higher on IGUESS, as well as a reference group of a random selection of 10%  
11  
12 of the participants. We have constructed two sub-cohorts from those who have participated in  
13  
14 the clinical diagnosis: a representative and a high-risk cohort. The representative sub-cohort  
15  
16 consists of 10% randomly selected adolescents from the full cohort. They participate in the  
17  
18 clinical diagnostic interview every year in order to estimate the false negative rate and to  
19  
20 evaluate the clinical course of IGD, observed via the diagnostic interviews. The high-risk  
21  
22 sub-cohort is comprised of participants meeting 3 or more of the 9 IGD criteria, based on the  
23  
24 clinical diagnostic interviews at baseline and each follow-up wave. The high-risk sub-cohort  
25  
26 is similar to a dynamic cohort. The suggested diagnostic criteria of IGD in DSM-5 is to meet  
27  
28 5 or more of the 9 IGD criteria; however, we plan to follow those adolescent participants  
29  
30 meeting 3 or more clinical diagnostic interview in any year in order to investigate the course  
31  
32 of IGD at syndromal and subsyndromal levels.  
33  
34  
35

36  
37 This study aims to clarify the natural and clinical courses of IGD based on the DSM-5  
38  
39 suggested diagnostic criteria in order to empirical validate the criteria and to evaluate the risk  
40  
41 and predictive factors in adolescents based on the IGD diagnostic criteria. This study will  
42  
43 contribute to establishing standardized IGD diagnostic criteria and to providing scientific  
44  
45 evidence regarding the proposed DSM-5 IGD diagnostic criteria.  
46  
47  
48  
49  
50  
51  
52

### 53 **Keywords:**

54 Internet gaming disorder, adolescents, cohort, protocol  
55

### 56 **Lists of Abbreviations**

57 Aggression Questionnaire (AQ)  
58  
59  
60

1  
2  
3  
4 Attention Deficit Hyperactivity Disorder (ADHD)  
5 Children's Depression Inventory (CDI)  
6 Children's Perception of Inter-parental Conflict Scale (CPIC)  
7 Diagnostic and Statistical Manual of Mental Disorders 5th version (DSM-5)  
8 Diagnostic Interview Schedule for Children, Version IV (DISC-IV)  
9 Global assessment scale (GAS)  
10 International Classification of Diseases 10th version (ICD-10)  
11 International Classification of Diseases 11th version (ICD-11)  
12 Internet Game Use-Elicited Symptom Screen (IGUESS)  
13 Internet gaming disorder (IGD)  
14 Internet user Cohort for Unbiased Recognition of gaming disorder in Early adolescents  
15 (iCURE)  
16 Kiddie-Schedule for Affective Disorders and Schizophrenia-Present and Lifetime Version-  
17 Korean version (K-SADS-PL)  
18 Korean version of the ADHD Rating Scale (K-ARS)  
19 Parent-Adolescent Communication Inventory (PACI)  
20 Parent-Adolescent Communication Inventory (PACI)  
21 Parenting attitude test (PAT)  
22 Patient Health Questionnaire (PHQ-9)  
23 Post-traumatic stress disorder (PTSD)  
24 Revised Inventory of Parent and Peer Attachment (IPPA-R)  
25 Smartphone Addiction Scale (SAS-SV)  
26 Social Support Appraisal Scale (SSAS)  
27 Standard Patients Evaluation of Eye Dryness Questionnaire (SPEED)  
28 Structured Clinical Interview for DSM-IV Axis I Disorders (SCID-I)  
29 Self-reported version of structured clinical interview for Internet Gaming Disorder (SR-IGD)  
30  
31  
32  
33

#### 34 **Funding:**

35 This study was supported by a grant from the Korean Mental Health Technology R&D  
36 Project, Ministry of Health and Welfare, Republic of Korea (HM14C2603). The Ministry of  
37 Health and Welfare had no further role in areas of study design, collection, analysis, and  
38 interpretation of data, report writing, or in the decision to submit the paper for publication.  
39

#### 40 **Availability of data and materials**

41 Not applicable. This protocol was not included any participants data.  
42  
43

#### 44 **Authors' contribution:**

45 HJ conducted the analyses and led the writing of the manuscript. HWY guided and  
46 supervised the writing of the manuscript. HWY, HJ, and SJ developed and proposed the basic  
47 idea of the study. HWY, HJ, SJ, EK, HS and HH contributed to conducting the study. SL, HL,  
48 YK, SB, and JC conducted diagnostic interviews. BK guided to performance DISC  
49 assessment. DAG advised to construct study design. DAG and MNP reviewed scientific and  
50 proof reading of the manuscript. All authors contributed editorial comments on the  
51 manuscript.  
52

#### 53 **Conflict of interest:**

54 The authors declare no conflicts of interest with respect to the content of the manuscript..  
55  
56

#### 57 **Consent for publication**

58  
59  
60

1  
2  
3  
4 Not applicable.  
5  
6  
7

## 8 9 **References**

- 10 1. Entertainment\_software\_association. 2012 Essential facts about the computer and video game  
11 industry. Retrieved from [http://www.theesacom/facts/pdfs/ESA\\_EF\\_2012pdf](http://www.theesacom/facts/pdfs/ESA_EF_2012pdf) 2012
- 12 2. Wan CS, Chiou WB. Why are adolescents addicted to online gaming? An interview study in  
13 Taiwan. *Cyberpsychology & behavior : the impact of the Internet, multimedia and virtual*  
14 *reality on behavior and society* 2006;9(6):762-6. doi: 10.1089/cpb.2006.9.762 [published  
15 Online First: 2007/01/05]
- 16 3. Wood RT, Griffiths MD. A qualitative investigation of problem gambling as an escape-based  
17 coping strategy. *Psychology and psychotherapy* 2007;80(Pt 1):107-25. doi:  
18 10.1348/147608306x107881 [published Online First: 2007/03/10]
- 19 4. Kuss DJ, Griffiths MD, Karila L, et al. Internet addiction: a systematic review of epidemiological  
20 research for the last decade. *Current pharmaceutical design* 2014;20(25):4026-52.  
21 [published Online First: 2013/09/05]
- 22 5. Boot WR, Kramer AF, Simons DJ, et al. The effects of video game playing on attention, memory,  
23 and executive control. *Acta psychologica* 2008;129(3):387-98. doi:  
24 10.1016/j.actpsy.2008.09.005 [published Online First: 2008/10/22]
- 25 6. Witt E. MA, , & Jackson L. Trends in youth's videogame playing, overall computer use, and  
26 communication technology use: The impact of self-esteem and the Big Five personality  
27 factors. *Computers in Human Behavior archive* 2011;27(2):763-69
- 28 7. Chan PA, Rabinowitz T. A cross-sectional analysis of video games and attention deficit  
29 hyperactivity disorder symptoms in adolescents. *Annals of general psychiatry* 2006;5:16.  
30 doi: 10.1186/1744-859x-5-16 [published Online First: 2006/10/25]
- 31 8. Desai RA, Krishnan-Sarin S, Cavallo D, et al. Video-gaming among high school students: health  
32 correlates, gender differences, and problematic gaming. *Pediatrics* 2010;126(6):e1414-24.  
33 doi: 10.1542/peds.2009-2706 [published Online First: 2010/11/17]
- 34 9. Van Rooij AJ, Schoenmakers TM, Vermulst AA, et al. Online video game addiction: identification  
35 of addicted adolescent gamers. *Addiction (Abingdon, England)* 2011;106(1):205-12. doi:  
36 10.1111/j.1360-0443.2010.03104.x [published Online First: 2010/09/16]
- 37 10. Barnett JaC, Mark Virtually real: a psychological perspective on massively multiplayer online  
38 games. . *Review of General Psychology* 2010;14(2):167-79.
- 39 11. Union IT. World Telecommunication/ ICT Indicators Database *17th edition* 2013
- 40 12. Service KSI. Statistics on Internet use. National Information Society Agency (2011) Internet  
41 Addiction Survey. *Agency NIS, Seoul, South Korea* 2013
- 42 13. Ministry of Culture S, and Tourism. Introduction of regulations of internet game in Korea. 2014
- 43 14. Choo H, Gentile DA, Sim T, et al. Pathological video-gaming among Singaporean youth. *Annals*  
44  
45  
46  
47  
48  
49  
50  
51  
52  
53  
54  
55  
56  
57  
58  
59  
60



- 1  
2  
3  
4  
5  
6  
7  
8  
9  
10  
11  
12  
13  
14  
15  
16  
17  
18  
19  
20  
21  
22  
23  
24  
25  
26  
27  
28  
29  
30  
31  
32  
33  
34  
35  
36  
37  
38  
39  
40  
41  
42  
43  
44  
45  
46  
47  
48  
49  
50  
51  
52  
53  
54  
55  
56  
57  
58  
59  
60
- of the Academy of Medicine, Singapore* 2010;39(11):822-9. [published Online First: 2010/12/18]
15. Lemmens JS, Valkenburg PM, Gentile DA. The Internet Gaming Disorder Scale. *Psychological assessment* 2015;27(2):567-82. doi: 10.1037/pas0000062 [published Online First: 2015/01/07]
16. Gentile D. Pathological video-game use among youth ages 8 to 18: a national study. *Psychological science* 2009;20(5):594-602. doi: 10.1111/j.1467-9280.2009.02340.x [published Online First: 2009/05/30]
17. Lam LT, Peng ZW, Mai JC, et al. Factors associated with Internet addiction among adolescents. *Cyberpsychology & behavior : the impact of the Internet, multimedia and virtual reality on behavior and society* 2009;12(5):551-5. doi: 10.1089/cpb.2009.0036 [published Online First: 2009/07/22]
18. AmericanPsychiatricAssociation. Diagnostic and Statistical Manual of Mental Disorders (DSM-5). 2013
19. Petry NM RF, Gentile DA, Lemmens JS, Rumpf H, Mößle T, et al. An international consensus for assessing Internet gaming disorder using the new DSM-5 approach. *Addiction* 2014;109(9):1399-406.
20. Griffiths MD, van Rooij AJ, Kardefelt-Winther D, et al. Working towards an international consensus on criteria for assessing internet gaming disorder: a critical commentary on Petry et al. (2014). *Addiction (Abingdon, England)* 2016;111(1):167-75. doi: 10.1111/add.13057 [published Online First: 2015/12/17]
21. Kardefelt-Winther D, Heeren A, Schimmenti A, et al. How can we conceptualize behavioural addiction without pathologizing common behaviours? *Addiction (Abingdon, England)* 2017 doi: 10.1111/add.13763 [published Online First: 2017/02/16]
22. Starcevic V. Tolerance and withdrawal symptoms may not be helpful to enhance understanding of behavioural addictions. *Addiction (Abingdon, England)* 2016;111(7):1307-8. doi: 10.1111/add.13381 [published Online First: 2016/04/21]
23. Ko CH, Yen JY, Chen SH, et al. Evaluation of the diagnostic criteria of Internet gaming disorder in the DSM-5 among young adults in Taiwan. *Journal of psychiatric research* 2014;53:103-10. doi: 10.1016/j.jpsychires.2014.02.008 [published Online First: 2014/03/04]
24. Kim Y, Cheon, K., Kim,B., Chang, S., Yoo, H., & Kim, J. . The reliability and validity of Kiddie Schedule for Affective Disorders and Schizophrenia Present and Lifetime Version-Korean version (K-SADSPL-K). *Yonsei Medical Journal* 2004;45:81-89.
25. Young KS. The research and controversy surrounding internet addiction. *Cyberpsychology & behavior : the impact of the Internet, multimedia and virtual reality on behavior and society* 1999;2(5):381-3. doi: 10.1089/cpb.1999.2.381 [published Online First: 1999/01/01]
26. Kim DI JY, Lee EA, Kim DM, Joe YM. Development of Internet Addiction Proneness Scale - Short Form (KS-Scale). *Korean J Counseling* 2008;9:1703-22.
27. Koo HJ, Han DH, Park SY, et al. The Structured Clinical Interview for DSM-5 Internet Gaming

- 1  
2  
3  
4 Disorder: Development and Validation for Diagnosing IGD in Adolescents. *Psychiatry*  
5 *investigation* 2017;14(1):21-29. doi: 10.4306/pi.2017.14.1.21 [published Online First:  
6 2017/01/18]  
7  
8  
9 28. Kwon M, Kim DJ, Cho H, et al. The smartphone addiction scale: development and validation of  
10 a short version for adolescents. *PLoS one* 2013;8(12):e83558. doi:  
11 10.1371/journal.pone.0083558 [published Online First: 2014/01/07]  
12  
13 29. Kovacs M, Feinberg TL, Crouse-Novak MA, et al. Depressive disorders in childhood. I. A  
14 longitudinal prospective study of characteristics and recovery. *Archives of general*  
15 *psychiatry* 1984;41(3):229-37. [published Online First: 1984/03/01]  
16  
17 30. Cho S. C.J. Development of State - Trait Anxiety Scale for Korean Children. *Medicine Journal of*  
18 *Seoul National University* 1989;14(3):150-57.  
19  
20 31. Spielberger CD. Manual for the State: Trait Anxiety Inventory for Children. *Palo Alto, Consulting*  
21 *Psychologist Press* 1972  
22  
23 32. GJ. D. Parent and teacher ratings of ADHD symptoms: psychometric properties in a  
24 community-based sample. *J Clin Child Psychol* 1990;20:245-53.  
25  
26 33. Kim JW, Park KH, Cheon KA, et al. The child behavior checklist together with the ADHD rating  
27 scale can diagnose ADHD in Korean community-based samples. *Canadian journal of*  
28 *psychiatry Revue canadienne de psychiatrie* 2005;50(12):802-5. doi:  
29 10.1177/070674370505001210 [published Online First: 2006/01/18]  
30  
31 34. Shaffer D, Fisher P, Lucas CP, et al. NIMH Diagnostic Interview Schedule for Children Version IV  
32 (NIMH DISC-IV): description, differences from previous versions, and reliability of some  
33 common diagnoses. *Journal of the American Academy of Child and Adolescent Psychiatry*  
34 2000;39(1):28-38. doi: 10.1097/00004583-200001000-00014 [published Online First:  
35 2000/01/19]  
36  
37 35. First MB, Spitzer, R. L, Gibbon M, and Williams, J.B.W.. Structured Clinical Interview for DSM-IV-  
38 TR Axis I Disorders, Research Version, Research Edition. (SCID-I). *New York: Biometrics*  
39 *Research, New York State Psychiatric Institute* 2002  
40  
41 36. Kroenke K, Spitzer RL, Williams JB. The PHQ-9: validity of a brief depression severity measure.  
42 *Journal of general internal medicine* 2001;16(9):606-13. [published Online First: 2001/09/15]  
43  
44 37. Rosenberg M. Society and the adolescent self-image. *Princeton, NJ: Princeton*  
45 *University Press* 1965  
46  
47 38. Gottfredson MR, & Hirschi,T. A general theory of crime. *Stanford, CA:Stanford University Press*  
48 1990  
49  
50 39. Buss AH, Perry M. The aggression questionnaire. *Journal of personality and social psychology*  
51 1992;63(3):452-9. [published Online First: 1992/09/01]  
52  
53 40. Dubow EF, Tisak J. The relation between stressful life events and adjustment in elementary  
54 school children: the role of social support and social problem-solving skills. *Child*  
55 *development* 1989;60(6):1412-23. [published Online First: 1989/12/01]  
56  
57 41. Bienvenu MJ. A parent-adolescent communication inventory. *Saluda, NC: Family Life publications*  
58  
59  
60

1  
2  
3  
4 1969

- 5  
6 42. Grych JH, Seid M, Fincham FD. Assessing marital conflict from the child's perspective: the  
7 children's perception of interparental conflict scale. *Child development* 1992;63(3):558-72.  
8 [published Online First: 1992/06/01]  
9  
10 43. Armsden GC, Greenberg MT. The inventory of parent and peer attachment: Individual  
11 differences and their relationship to psychological well-being in adolescence. *Journal of*  
12 *youth and adolescence* 1987;16(5):427-54. doi: 10.1007/bf02202939 [published Online First:  
13 1987/10/01]  
14  
15 44. Gentile DA, Choo H, Liau A, et al. Pathological video game use among youths: a two-year  
16 longitudinal study. *Pediatrics* 2011;127(2):e319-29. doi: 10.1542/peds.2010-1353 [published  
17 Online First: 2011/01/19]  
18  
19  
20  
21  
22  
23  
24  
25  
26  
27  
28  
29  
30  
31  
32  
33  
34  
35  
36  
37  
38  
39  
40  
41  
42  
43  
44  
45  
46  
47  
48  
49  
50  
51  
52  
53  
54  
55  
56  
57  
58  
59  
60

Table 1. Measurement tools in each wave

| Categories                | Measures                                                | Source         | Wave |    |    |    |
|---------------------------|---------------------------------------------------------|----------------|------|----|----|----|
|                           |                                                         |                | T1   | T2 | T3 | T4 |
| Exposure variables        | Exposure time to internet, smart phone, and online game | student/parent | √    | √  | √  | √  |
|                           | Internet, smart phone, and online game using behaviors  | Student        | √    | √  | √  | √  |
| Diagnosis                 | IAT                                                     | Student        | √    |    |    |    |
|                           | K-scale                                                 | Student        | √    |    |    |    |
|                           | IGUESS                                                  | Student        | √    | √  | √  | √  |
|                           | SR-IGD                                                  | Student        | √    |    | √  | √  |
|                           | SAS-SV                                                  | Student        | √    | √  | √  | √  |
| Psychiatric comorbidities | CDI                                                     | Student        | √    | √  | √  | √  |
|                           | TAIC                                                    | Student        | √    | √  | √  | √  |
|                           | K-ARS                                                   | Parent         | √    |    |    |    |
|                           | DISC-IV                                                 | Parent         | √    |    |    |    |
|                           | Suicidality                                             | Student        | √    | √  | √  | √  |
|                           | PHQ-9                                                   | Parent         | √    |    |    |    |
|                           |                                                         |                |      |    |    |    |
| Personal factors          | Rosenberg's Self-Esteem Scale                           | Student        | √    |    |    |    |
|                           | Self-control scale                                      | Student        | √    |    |    |    |
|                           | AQ                                                      | Student        | √    | √  | √  | √  |
|                           | Demographic information                                 | Student/parent | √    |    |    |    |
|                           | Academic achievement                                    | Student/parent | √    | √  | √  | √  |
| Environmental factors     | School policy on having smart phone use in school       | Student        | √    | √  | √  | √  |
|                           | PACI                                                    | Student        | √    |    |    |    |
|                           | Marriage satisfaction                                   | Parent         | √    |    |    |    |
|                           | IPPA-R                                                  | Student        | √    |    |    |    |
|                           | Perceived Parenting Competence                          | Parent         | √    |    |    |    |
| Social factors            | Online gaming rule in home                              | Parent         | √    | √  | √  | √  |
|                           | Social network                                          | Student        | √    |    |    |    |
|                           | Bullying scale                                          | Student        | √    |    |    |    |
|                           | SSAS                                                    | Student        | √    |    |    |    |
| Health consequences       | Physical health                                         | Student/parent | √    |    |    |    |
|                           | Mental health                                           | Student        | √    |    |    |    |

Internet Addiction Test (IAT); Korean Scale for Internet Addiction (K-Scale); Internet Game Use-Elicited Symptom Screen (IGUESS); Self-reported version of structured clinical interview for Internet Gaming Disorder (SR-IGD); Short version of the Smartphone Addiction Scale (SAS-SV); Children's Depression Inventory (CDI); Trait Anxiety Inventory for Children (TAIC); Korean version of the ADHD Rating Scale (K-ARS); Diagnostic Interview Schedule for Children, Version IV (DISC-IV); Patient Health Questionnaire (PHQ-9); Aggression Questionnaire (AQ); Parent-Adolescent Communication Inventory (PACI); Revised Inventory of Parent and Peer Attachment (IPPA-R); Social Support Appraisals Scale: Child's Subjective Appraisal of Family, Peer, and Teacher Support (SSAS)
